# Supplementary material for: DNA-RNA hybrids at DSBs interfere with repair by homologous recombination
Source: eLife. 2021 Jul 8;10:e69881. doi: 10.7554/eLife.69881 (PMC8289408; doi:10.7554/eLife.69881)
Supplement: Figure 1—figure supplement 1—source data 1. [file elife-69881-fig1-figsupp1-data1.xlsx]

## Sheet: 1-s1
Figure 1-figure supplement 1a
	%leu2 relative mRNA levels (a.u.)
	Low transcription	High transcription	Low transcription	High transcription
Experiment	FRT-T	FRT-T	FRT-NT	FRT-NT
1	5.04641	100	5.36704	100
2	5.75481	100	7.85159	100
3	5.63399	100	7.46636	100
Figure 1-figure supplement 1b
Low transcription	Low transcription	Low transcription	Low transcription	Low transcription	Low transcription	Low transcription	Low transcription	Low transcription
		WT FRTt					hpr1 FRTt
transformant	colony	-ura	ypad		transformant	colony	-ura	ypad
1	1	137	137		1	1	161	185
	2	112	114			2	135	206
	3	145	134			3	216	212
	4	104	123			4	321	290
	5	72	76			5	160	163
	6	85	99			6	217	176
2	1	240	238		2	1	112	111
	2	60	53			2	98	95
	3	89	116			3	67	77
	4	113	114			4	65	43
	5	88	107			5	36	28
	6	69	72			6	18	26
3	1	48	50		3	1	23	23
	2	111	86			2	22	25
	3	80	80			3	39	40
		WT FRTnt					hpr1 FRTnt
transformant	colony	-ura	ypad		transformant	colony	-ura	ypad
1	1	126	112		1	1	243	293
	2	66	72			2	247	302
	3	126	112			3	340	291
	4	106	106			4	324	330
	5	81	88			5	286	234
	6	79	93			6	258	280
2	1	121	111		2	1	27	34
	2	90	94			2	116	108
	3	58	47			3	130	135
	4	129	135			4	120	113
	5	85	114			5	112	94
	6	113	86				89	82
3	1	57	49		3	1	36	53
	2	72	72			2	40	42
	3	50	54			3	40	42
		rnh1rnh201 FRTt
transformant	colony	-ura	ypad
1	1	91	73
	2	53	59
	3	82	73
	4	90	87
	5	75	67
	6	125	108
2	1	159	158
	2	81	67
	3	135	98
	4	140	129
	5	20	36
	6	157	103
3	1	42	43
	2	43	42
	3	54	50
		rnh1rnh201 FRTnt
transformant	colony	-ura	ypad
1	1	39	23
	2	17	23
	3	55	35
	4	42	42
	5	35	38
	6	48	47
2	1	34	28
	2	115	87
	3	124	93
	4	104	81
	5	93	93
3	1	36	33
	2	43	47
	3	54	50
High transcription	High transcription	High transcription	High transcription	High transcription	High transcription	High transcription	High transcription	High transcription	High transcription
		WT FRTt						hpr1 FRTt
transformant	colony	-ura	ypad			transformant	colony	-ura	ypad
1	1	120	146			1	1	224	208
	2	189	104				2	256	212
	3	108	117				3	196	160
	4	60	56				4	199	174
	5	112	98				5	148	119
	6	122	160				6	107	130
2	1	111	101			2	1	95	112
	2	75	91				2	133	98
	3	157	134				3	85	85
	4	74	74				4	115	104
	5	183	157				5	78	85
	6	106	103				6	62	48
3	1	76	75			3	1	20	20
	2	95	86				2	26	26
	3	59	65				3	24	26
							4
							5
							6
		WT FRTnt						hpr1 FRTnt
transformant	colony	-ura	ypad			transformant	colony	-ura	ypad
1	1	57	60			1	1	181	214
	2	106	130				2	180	206
	3	67	79				3	322	346
	4	65	56				4	172	198
	5	83	82				5	244	261
	6	61	57
2	1	153	164			2	1	85	87
	2	131	133				2	89	89
	3	139	168				3	29	29
	4	137	119				4	90	90
	5	62	51				5	43	43
	6	108	111					92	92
3	1	64	46			3	1	23	15
	2	28	28				2	38	44
	3	24	23				3	52	47
		rnh1rnh201 FRTt
transformant	colony	-ura	ypad
1	1	71	53
	2	96	85
	3	50	72
	4	99	70
	5	78	64
	6	47	40
2	1	105	88
	2	88	72
	3	113	98
	4	130	105
	5	109	116
	6	138	121
3	1	38	42
	2	45	41
	3	22	22
	4	54	52
		rnh1rnh201 FRTnt
transformant	colony	-ura	ypad
1	1	33	28
	2	23	22
	3	51	41
	4	20	10
	5	16	18
	6	35	32
2	1	99	100
	2	87	86
	3	80	89
	4	108	77
	5	91	88
		64	66
3	1	40	48
	2	44	37
	3	53	41
	4	41	43
	5	43	39
Figure 1-figure supplement 1c
low transcription
3h of HO induction	3h of HO induction	3h of HO induction	3h of HO induction	3h of HO induction	3h of HO induction	3h of HO induction	3h of HO induction	3h of HO induction	3h of HO induction	3h of HO induction	3h of HO induction	3h of HO induction	3h of HO induction	3h of HO induction	3h of HO induction	3h of HO induction	3h of HO induction
		WT HO					rnh1rnh201 HO							hpr1 HO
transformant	colony	-ura	ypad		transformant	colony	-ura	ypad				transformant	colony	-ura	ypad
1	1	20	68		1	1	4	33				1	1	12	48	25
	2	18	116			2	20	73					2	17	80	21.25
	3	57	118			3	21	52					3	7	40	17.5
	4	21	130			4	4	61					4	8	32	25
	5	41	100			5	18	56					5	12	51	23.5294
	6	8	68			6	12	35					6	9	32	28.125
2	1	81	140		2	1	47	73				2	1	43	97
	2	16	88			2	18	101					2	15	48
	3	30	179			3	35	92					3	28	63
	4	90	190			4	37	83					4	27	92
	5	40	153			5	48	137					5	11	72
	6	26	153				47	132						28	97
3	1	40	86		3	1	32	94				3	1	5	37
	2	4	41			2	3	61					2	7	51
	3	3	33			3	4	34					3	12	37
	4	48	100			4	15	90					4	17	51
	5	13	52			5	14	62
	6	11	38				25	112
4	1	23	115		4	1	11	102				4	1	8	38
	2	70	133			2	19	114					2	36	85
	3	14	120			3	17	75					3	10	64
	4	4	54										4	7	52
	5	39	145										5	8	40
													6	16	63
high transcription
3h of HO induction	3h of HO induction	3h of HO induction	3h of HO induction	3h of HO induction	3h of HO induction	3h of HO induction	3h of HO induction	3h of HO induction	3h of HO induction	3h of HO induction	3h of HO induction	3h of HO induction	3h of HO induction	3h of HO induction	3h of HO induction	3h of HO induction	3h of HO induction
		WT HO					rnh1rnh201 HO							hpr1 HO
transformant	colony	-ura	ypad		transformant	colony	-ura	ypad				transformant	colony	-ura	ypad
1	1	49	49		1	1	7	72				1	1	22	12
	2	13	31			2	7	24					2	5	12
	3	29	86			3	22	58					3	15	69
	4	45	38			4	23	36					4	11	69
						5	23	28					5	9	69
						6	13	26					6	14	23
2	1	60	59		2	1	89	106				2	1	39	93
	2	36	66			2	34	60					2	58	104
	3	101	114			3	74	120					3	45	110
	4	94	108			4	34	84					4	40	65
	5	147	127			5	63	111					5	47	110
	6	124	134				82	145						18	39
3	1	8	42		3	1	21	63				3	1	13	36
	2	15	32			2	15	37					2	9	22
	3	55	73			3	24	68					3	13	35
	4	79	109			4	46	71					4	20	48
	5	53	96			5	23	61					5	26	44
	6	59	11				43	56						28	55
4	1	85	104		4	1	13	50				4	1	6	30
	2	96	124			2	42	88					2	14	29
	3	90	132			3	19	52					3	50	85
	4	48	99			4	31	65					4	65	90
						5	75	124					5	29	42
						6	79	102					6	13	28
