# Supplementary material for: DNA-RNA hybrids at DSBs interfere with repair by homologous recombination
Source: eLife. 2021 Jul 8;10:e69881. doi: 10.7554/eLife.69881 (PMC8289408; doi:10.7554/eLife.69881)
Supplement: Figure 1—source data 1. [file elife-69881-fig1-data1.xlsx]

## Sheet: Fig. 1
Figure 1b
Low transcription	Low transcription	Low transcription	Low transcription	Low transcription	Low transcription	Low transcription	Low transcription	Low transcription	Low transcription	Low transcription	Low transcription	Low transcription	Low transcription	Low transcription	Low transcription	Low transcription	Low transcription	Low transcription	Low transcription	Low transcription	Low transcription	Low transcription	Low transcription
		WT FRTt							rnh1rnh201 FRTt							hpr1 FRTt
transformant	colony	-ura	ypad				transformant	colony	-ura	ypad				transformant	colony	-ura	ypad
1	1	77	79				1	1	150	146				1	1	78	83
	2	86	121					2	136	109					2	90	72
	3	98	98					3	116	120					3	123	137
	4	90	98					4	96	112					4	81	97
	5	91	95					5	110	107					5	81	77
	6	107	90					6	138	120					6	69	93
2	1	104	74				2	1	98	118				2	1	75	70
	2	85	92					2	94	102					2	21	48
	3	75	88					3	100	98					3	43	49
	4	134	142					4	90	90					4	60	73
	5	100	120					5	96	70					5	45	45
	6	100	100					6	53	56					6	48	55
3	1	122	92				3	1	94	114				3	1	67	74
	2	98	120					2	121	133					2	66	65
	3	110	150					3	84	90					3	92	68
	4	116	119					4	122	101					4	41	48
	5	132	132					5	121	104					5	56	46
	6	124	124												6	42	38
		WT FRTnt							rnh1rnh201 FRTnt							hpr1 FRTnt
transformant	colony	-ura	ypad				transformant	colony	-ura	ypad				transformant	colony	-ura	ypad
1	1	83	121				1	1	109	117				1	1	100	88
	2	119	105					2	43	41					2	125	142
	3	93	85					3	93	95					3	137	140
	4	115	137					4	108	76					4	171	202
	5	70	91					5	156	125					5	127	138
	6	96	85					6	85	113					6	138	202
2	1	149	61				2	1	103	104				2	1	57	73
	2	96	113					2	112	106					2	76	87
	3	71	61					3	109	113					3	69	72
	4	78	66					4	97	98					4	63	61
	5	65	68					5	92	75					5	89	63
	6	63	88						79	102					6	57	62
3	1	104	108				3	1	88	102				3	1	72	94
	2	142	128					2	132	127					2	53	55
	3	100	96					3	114	118					3	76	57
	4	116	120					4	105	118					4	87	80
	5	100	126					5	100	123					5	79	66
								6	107	108					6	107	123
1h of HO induction	1h of HO induction	1h of HO induction	1h of HO induction	1h of HO induction	1h of HO induction	1h of HO induction	1h of HO induction	1h of HO induction	1h of HO induction	1h of HO induction	1h of HO induction	1h of HO induction	1h of HO induction	1h of HO induction	1h of HO induction	1h of HO induction	1h of HO induction	1h of HO induction
		WT HO							rnh1rnh201 HO							hpr1 HO
transformant	colony	-ura	ypad				transformant	colony	-ura	ypad				transformant	colony	-ura	ypad
1	1	51	60				1	1	22	26				1	1	19	20
	2	26	40					2	16	22					2	15	22
	3	30	40					3	23	39					3	22	28
	4	25	40					4	57	85					4	18	25
	5	37	50					5	37	45					5	45	28
	6	60	870					6	41	54					6	10	22
2	1	131	122				2	1	69	92				2	1	84	76
	2	69	73					2	55	90					2	56	87
	3	69	95					3	67	76					3	42	55
	4	137	145					4	72	72					4	53	62
	5	78	97					5	105	92					5	21	36
	6	86	110						71	96						53	55
3	1	61	92				3	1	62	58				3	1	36	47
	2	15	34					2	88	97					2	49	63
	3	28	62					3	16	48					3	56	79
	4	103	150					4	64	100					4	37	41
	5	45	60					5	60	89					5	42	51
	6	29	58						41	62						42	62
4	1	79	127				4	1	46	76				4	1	13	21
	2	108	228					2	19	44					2	41	60
	3	86	102					3	43	61					3	18	40
	4	28	70					4	16	33					4	26	40
	5	22	46					5	26	56					5	19	21
	6	52	112					6	25	49					6	23	40
High transcription	High transcription	High transcription	High transcription	High transcription	High transcription	High transcription	High transcription	High transcription	High transcription	High transcription	High transcription	High transcription	High transcription	High transcription	High transcription	High transcription	High transcription	High transcription	High transcription	High transcription	High transcription	High transcription	High transcription	High transcription
		WT FRTt							rnh1rnh201 FRTt							hpr1 FRTt
transformant	colony	-ura	ypad				transformant	colony	-ura	ypad				transformant	colony	-ura	ypad
1	1	96	73				1	1	82	109				1	1	64	80
	2	99	103					2	99	121					2	59	102
	3	94	87					3	91	150					3	70	109
	4	107	114					4	110	138					4	54	60
	5	88	72					5	97	139					5	63	75
	6	116	96					6	95	137					6	66	111
2	1	85	99				2	1	63	99				2	1	63	54
	2	69	77					2	87	93					2	47	58
	3	106	98					3	73	82					3	62	89
	4	84	93					4	88	95					4	49	49
	5	105	95												5	62	85
	6	105	112												6	46	70
3	1	120	119				3	1	91	122				3	1	61	83
	2	124	134					2	86	120					2	44	54
	3	147	157					3	69	80					3	71	83
	4	140	110					4	81	167					4	58	74
								5	56	85					5	40	60
								6	109	171					6	58	86
		WT FRTnt							rnh1rnh201 FRTnt							hpr1 FRTnt
transformant	colony	-ura	ypad				transformant	colony	-ura	ypad				transformant	colony	-ura	ypad
1	1	93	100				1	1	97	107				1	1	90	106
	2	94	101					2	99	116					2	100	124
	3	102	86					3	102	161					3	64	82
	4	82	93					4	82	104					4	87	108
	5	96	102					5	60	85					5	110	143
	6	117	107					6	100	117					6	104	130
2	1	120	114				2	1	57	86				2	1	49	65
	2	92	97					2	76	68					2	84	82
	3	101	134					3	75	112					3	60	64
	4	100	112					4	73	100					4	56	56
	5	94	77					5	65	66					5	43	71
	6	116	114						77	87						58	79
3	1	99	122				3	1	64	83				3	1	85	71
	2	153	176					2	84	129					2	37	55
	3	180	148					3	88	123					3	33	53
	4	140	126					4	56	99					4	53	79
	5	159	114					5	111	112					5	57	69
	6	139	124					6	75	99						55	66
1h of HO induction	1h of HO induction	1h of HO induction	1h of HO induction	1h of HO induction	1h of HO induction	1h of HO induction	1h of HO induction	1h of HO induction	1h of HO induction	1h of HO induction	1h of HO induction	1h of HO induction	1h of HO induction	1h of HO induction	1h of HO induction	1h of HO induction	1h of HO induction	1h of HO induction
		WT HO							rnh1rnh201 HO							hpr1 HO
transformant	colony	-ura	ypad				transformant	colony	-ura	ypad				transformant	colony	-ura	ypad
1	1	17	29				1	1	25	31				1	1	15	30
	2	69	70					2	40	63					2	38	54
	3	39	40					3	30	37					3	23	18
	4	19	12					4	47	70					4	5	12
	5	28	35					5	21	26					5	41	53
	6	114	83					6	30	71					6	6	19
2	1	60	74				2	1	137	152				2	1	36	42
	2	29	34					2	62	84					2	45	44
	3	81	92					3	83	130					3	54	82
	4	98	112					4	50	62					4	29	42
	5	121	109					5	72	110					5	52	97
	6	137	171						105	159						9	14
3	1	47	39				3	1	39	45				3	1	23	28
	2	21	211					2	39	56					2	38	45
	3	97	91					3	55	62					3	33	28
	4	90	81					4	64	52					4	25	35
	5	49	76					5	46	66					5	35	36
	6	69	75						95	136						35	69
4	1	36	42				4	1	33	39				4	1	44	70
	2	35	41					2	39	68					2	26	37
	3	79	96					3	24	30					3	35	49
	4	90	85					4	37	46					4	15	17
	5	68	91					5	64	75
	6	54	47					6	78	110
Figure 1c
Low transcription	Low transcription	Low transcription	Low transcription	Low transcription	Low transcription	Low transcription	Low transcription	Low transcription	Low transcription	Low transcription	Low transcription	Low transcription	Low transcription	Low transcription	Low transcription	Low transcription	Low transcription	Low transcription	Low transcription	Low transcription	Low transcription	Low transcription
		WT FRTt							hpr1 FRTt							WT HO					hpr1 HO
transformant	colony	-ura	ypad				transformant	colony	-ura	ypad				transformant	colony	-ura	ypad		transformant	colony	-ura	ypad
1	1	86	91				1	1	38	48				1	1	70	68		1	1	88	78
	2	138	170					2	46	50					2	70	57			2	74	71
	3	120	123					3	70	71					3	106	71			3	79	60
	4	151	179					4	79	89					4	129	93			4	53	52
	5	164	148					5	37	42					5	74	71			5	70	61
	6	122	169					6	47	62					6	108	71			6	62	34
2	1	150	180				2	1	93	75				2	1	63	97			1	31	37
	2	145	121					2	90	93					2	50	47			2	24	32
	3	93	116					3	75	79					3	68	69			3	50	49
	4	118	119					4	65	89					4	90	98			4	39	47
	5	86	108					5	74	76					5	77	73			5	14	30
	6	134	102					6	82	91					6	70	63
3	1	88	100				3	1	54	54				3	1	121	190			1	10	11
	2	161	156					2	58	51					2	40	93			2	32	57
	3	148	136					3	79	98					3	76	154			3	24	51
	4	132	131					4	81	100					4	47	122			4	32	49
	5	93	118					5	114	97					5	31	97			5	41	47
	6	118	113					6	124	105					6	51	108			6	21	43
4	1	78	74				4	1	74	65				4	1	32	63			1	45	63
	2	127	119					2	127	90					2	24	52			2	55	88
	3	99	107					3	85	92					3	41	102			3	60	48
	4	138	161					4	79	94					4	22	38			4	52	62
	5	133	136					5	88	93					5	45	113			5	44	58
	6	139	170												6	33	69			6	29	33
		WT FRTt +RNH1							hpr1 FRTt +RNH1					5	1	77	91		5	1	34	49
transformant	colony	-ura	ypad				transformant	colony	-ura	ypad					2	103	126			2	69	79
1	1	68	76				1	1	24	21					3	62	105			3	55	55
	2	97	96					2	42	43					4	125	154			4	54	80
	3	36	58					3	7	17					5	113	138			5	36	44
	4	85	93					4	59	49					6	183	181			6	82	67
	5	56	78					5	8	11						WT HO +RNH1					hpr1 HO +RNH1
	6	84	66											transformant	colony	-ura	ypad		transformant	colony	-ura	ypad
2	1	48	91				2	1	38	60				1	1	48	38		1	1	64	45
	2	43	70					2	32	49					2	106	80			2	64	52
	3	81	104					3	30	41					3	58	51			3	66	53
	4	71	83					4	15	21					4	66	60			4	45	51
	5	46	78					5	22	36					5	48	68			5	93	89
	6	69	91					6	23	29					6	110	64			6
3	1	94	87				3	1	52	43				2	1	36	43		2	1	35	33
	2	32	37					2	54	54					2	57	107			2	23	16
	3	70	65					3	61	46					3	50	70			3	38	65
	4	58	40					4	26	28					4	53	96			4	22	33
	5	94	80					5	24	40					5	31	53			5	39	45
	6	69	82					6	25	39					6	26	67			6	27	36
4	1	72	72				4	1	137	132				3	1	59	89		3	1	4	17
	2	119	113					2	84	48					2	31	49			2	38	51
	3	155	127					3	74	72					3	82	159			3	33	50
	4	83	77					4	37	48					4	206	202			4	28	42
	5	61	58					5	70	60					5	79	159			5	13	61
	6	92	119					6	40	60					6	29	100			6	16	61
														4	1	39	39		4	1	27	28
															2	64	54			2	103	105
															3	43	42			3	30	31
															4	35	36			4	41	40
															5	51	51			5	56	58
															6	39	27			6	17	12
														5	1	163	176		5	1	23	35
															2	143	185			2	28	38
															3	71	74			3	36	48
															4	43	74			4	15	9
															5	40	60			5	43	66
															6	115	118
High transcription	High transcription	High transcription	High transcription	High transcription	High transcription	High transcription	High transcription	High transcription	High transcription	High transcription	High transcription	High transcription	High transcription	High transcription	High transcription	High transcription	High transcription	High transcription	High transcription	High transcription	High transcription	High transcription	High transcription	High transcription	High transcription
		WT FRTt							hpr1 FRTt							WT HO					hpr1 HO
transformant	colony	-ura	ypad				transformant	colony	-ura	ypad				transformant	colony	-ura	ypad		transformant	colony	-ura	ypad
1	1	116	110				1	1	76	105				1	1	141	152		1	1	25	57
	2	102	86					2	130	148					2	146	132			2	37	52
	3	129	122					3	69	97					3	60	67			3	76	90
	4	109	116					4	74	95					4	58	43			4	53	62
	5	108	152					5	76	101					5	56	61			5	65	98
	6	128	116					6	73	79					6	95	97			6	32	47
2	1	127	145				2	1	91	139				2	1	59	81		2	1	21	25
	2	140	184					2	124	198					2	62	78			2	64	84
	3	179	172					3	100	136					3	27	29			3	32	34
	4	141	136					4	100	124					4	37	38			4	45	68
	5	158	163					5	86	112					5	33	37			5	36	51
	6	135	153					6	102	102					6	33	47			6	83	89
3	1	138	172				3	1	96	124				3	1	123	112		3	1	27	33
	2	175	150					2	129	153					2	67	61			2	29	15
	3	180	164					3	117	130					3	67	65			3	44	61
	4	149	158					4	111	145					4	75	67			4	35	48
	5	160	169					5	84	122					5	59	69			5	65	72
	6	179	158					6	75	123					6	91	87			6	26	18
4	1	105	104				4	1	45	78				4	1	64	84		4	1	86	134
	2	135	143					2	74	90					2	87	113			2	89	128
	3	120	129					3	95	98					3	59	72			3	33	49
	4	122	105					4	94	117					4	55	66			4	31	37
	5	181	170					5	56	98					5	57	68			5	59	65
	6	120	130					6	78	133					6	53	69			6	24	35
		WT FRTt +RNH1							hpr1 FRTt +RNH1					5	1	41	39		5	1	28	34
transformant	colony	-ura	ypad				transformant	colony	-ura	ypad					2	79	88			2	112	134
1	1	35	36				1	1	26	35					3	61	66			3	51	68
	2	48	60					2	30	44					4	19	38			4	75	103
	3	26	41					3	46	40					5	73	78			5	75	114
	4	31	51					4	57	58					6	58	61			6	91	91
	5	46	46					5	44	36						WT HO +RNH1					hpr1 HO +RNH1
	6	48	60					6	34	37				transformant	colony	-ura	ypad		transformant	colony	-ura	ypad
2	1	35	54				2	1	11	21				1	1	85	64		1	1	49	36
	2	58	68					2	25	35					2	129	116			2	55	64
	3	57	59					3	14	23					3	39	51			3	71	70
	4	175	214					4	24	25					4	131	99			4	33	24
	5	62	86					5	24	20					5	117	85			5	69	62
	6	70	101					6	15	23					6	58	55			6	44	41
3	1	106	101				3	1	32	31				2	1	39	31		2	1	14	20
	2	76	93					2	15	20					2	32	41			2	32	50
	3	66	72					3	52	58					3	82	78			3	15	13
	4	72	73					4	62	65					4	55	58			4	25	20
	5	75	69					5	66	74					5	88	88			5	20	26
	6	53	43					6	82	72										6	16	16
4	1	99	102				4	1	113	109				3	1	26	26		3	1	51	57
	2	71	87					2	63	58					2	16	33			2	39	38
	3	65	69					3	37	33					3	54	45			3	26	42
	4	84	114					4	43	42					4	27	49			4	29	28
	5	27	46					5	73	67					5	73	81			5	37	44
	6	93	101					6	42	64					6	28	33			6	58	66
														4	1	85	90		4	1	52	31
															2	28	44			2	63	53
															3	139	122			3	77	59
															4	50	54			4	76	98
															5	70	82			5	55	56
															6	38	55			6	35	30
														5	1	136	146		5	1	28	29
															2	152	138			2	40	42
															3	76	89			3	13	13
															4	97	82			4	36	33
															5	152	144			5	28	38
															6	69	73			6	40	66
