# Supplementary material for: DNA-RNA hybrids at DSBs interfere with repair by homologous recombination
Source: eLife. 2021 Jul 8;10:e69881. doi: 10.7554/eLife.69881 (PMC8289408; doi:10.7554/eLife.69881)
Supplement: Figure 2—figure supplement 1—source data 1. [file elife-69881-fig2-figsupp1-data1.xlsx]

## Sheet: 2-s1
Figure 2-figure supplement 1a
	% Nicks					Figure 1-figure supplement 1a				Figure 1-figure supplement 1b
		High transcription			WT lines 1-6, rnh1∆ rnh201∆ lines 7-12, hpr1∆ lines 13-18					WT lines 1-6, rnh1∆ rnh201∆ lines 7-12, hpr1∆ lines 13-18
		WT	rnh1rnh201	hpr1
Gal (h)	0	0	0	0
	1.5	2.46263	3.90448	2.07905
	3	7.18441	10.4023	5.87187
	4.5	8.71553	10.6063	6.98218
	7.5	7.50604	10.9593	9.13067
Figure 2-figure supplement 1b
	% Nicks
	Low transcription
		WT	rnh1rnh201	hpr1
Gal (h)	0	0	0	0
	1.5	6.43943	8.19475	3.47898
	3	12.1542	13.3705	12.2054
	4.5	11.7987	16.6065	12.2391
	7.5	14.5511	19.4283	16.491
Figure 1-figure supplement 1c
	%DSBs
	High transcription
		FRT-T											FRT-NT
		WT					hpr1			rnh1rnh201			WT			rnh1rnh201			hpr1
	Experiment	1	2	3	4	5	1	2	3	1	1	3	1	2	3	1	2	3	1	2	3
Gal (h)	0	0	0	0	0	0	0	0	0	0	0	0	0	0	0	0	0	0	0	0	0
	1.5	0.046942	0.084393	0.150913	0.032367	0.04915	0.115228	0.287195	0.0344341	0.276834	0.134104	0.0039324	0.044807	0.09545	0.065863	0.0632104	0.133873	0.030084	0.136798	0.154235	0.0485012
	3	0.252224	0.260289	0.322911	0.151954	0.096258	0.287648	0.378135	0.182408	0.384289	0.198466	0.149484	0.079197	0.219522	0.126513	0.154659	0.188331	0.220839	0.223231	0.428839	0.0917264
	4.5	0.478241	0.331638	0.263194	0.019607	0.146467	0.351409	0.282373	0.252005	0.505064	0.370928	0.260402	0.224797	0.207083	0.146545	0.289092	0.455616	0.499839	0.320047	0.392963	0.11142
	6	0.491745	0.303742	0.33322	0.025855	0.107409	0.45185	0.424323	0.298977	0.479714	0.332236	0.325219	0.293965	0.264637	0.176862	0.333562	0.353064	0.808572	0.420196	0.47899	0.207852
	7.5	0.302125	0.477519	0.387092	0.037382	0.010656	0.498158	0.203795	0.372825	0.655994	0.457513	0.289873	0.228878	0.252829	0.225872	0.623205	0.397489	0.783661	0.449788	0.63631	0.174706
	9	0.275765	0.270768	0.462313	0.249484	0.037688	0.925757	0.0306094	0.349489	0.552261	0.569071	0.173366	0.179341	0.25489	0.180329	0.594727	0.327493	0.77034	0.528606	0.781382	0.235003
	%SCR+ICR
	High transcription
		FRT-T											FRT-NT
		WT					hpr1			rnh1rnh201			WT			rnh1rnh201			hpr1
	Experiment	1	2	3	4	5	1	2	3	1	2	3	1	2	3	1	2	3	1	2	3
Gal (h)	0	0	0	0	0	0	0	0	0	0	0	0	0	0	0	0	0	0	0	0	0
	1.5	0.019366	0.032538	0.123365	0.04955	0.017133	0.0707144	0	0.0339462	0.157124	0.0542108	0	0.074352	0.093866	0.0594	0.0354669	0.187587	0.0419226	0.0857142	0.22296	0.0191926
	3	0.192442	0.166819	0.183932	0.063478	0.108984	0.242999	0	0.217474	0.273886	0.0116671	0.0866365	0.166884	0.212233	0.164356	0.0981149	0.313337	0.13385	0.199833	0.446631	0.1667
	4.5	0.48186	0.371524	0.224855	0.07386	0.155993	0.32819	0.118128	0.411055	0.520904	0.230148	0.262212	0.316319	0.289837	0.198563	0.145094	0.709547	0.509593	0.374423	0.391968	0.290052
	6	0.485958	0.492043	0.278077	0.169425	0.200548	0.587767	0.186015	0.532803	0.679608	0.20265	0.382311	0.380066	0.414678	0.276023	0.331043	0.572127	0.568932	0.612032	0.503946	0.430339
	7.5	0.465621	0.640794	0.362008	0.35206	0.209116	0.622776	0.32547	0.738817	0.933903	0.398368	0.471798	0.523726	0.446501	0.283973	0.477913	0.853378	0.626931	0.645413	0.746954	0.475452
	9	0.595187	0.61901	0.516142	0.596616	0.165975	1.24701	0.444296	0.858562	0.923958	0.519197	0.517335	0.451634	0.651198	0.31257	0.565013	0.97261	0.716467	0.854648	1.0566	0.533803
Figure 2-figure supplement 1d
	%DSBs
	Low transcription
		FRT-T											FRT-NT
		WT					hpr1			rnh1rnh201			WT							hpr1			rnh1∆rnh201∆
	Experiment	1	2	3	4	5	1	2	3	1	2	3	1	2	3	4	5	6	7	1	2	3	1	2	3	4
Gal (h)	0	0	0	0	0	0	0	0	0	0	0	0	0	0	0	0	0	0	0	0	0	0	0	0	0	0
	1.5	0.127455	0.101258		0.103452	0.20502	0.0850707		0.0877724	0.414227	0.152548		0.158525	0.191891	0.086788	0.061845		0.190673	0.158009			0.095755	0.119878	0.192257	0.136999	0.0833508
	3	0.482707	0.291457		0.31918	0.37374	0.153382	0.414436	0.276564	0.704171	0.313291	0.156237	0.300016	0.350373	0.221992	0.282666	0.095644	0.837154	0.272143	0.233621	0.18964		0.348529	0.197192	0.422337	0.315633
	4.5	0.501104	0.431537		0.398502	0.42983	0.577433	0.707349	0.538246	0.840215	0.469389	0.408603	0.360037	0.283366	0.190791	0.468165	0.298124	0.717762	0.316294	0.617486	0.308891	0.521112	0.442138	0.500644	0.709313	0.518331
	6	0.543209	0.481905	0.338321	0.162491	0.521991	0.607802	0.81397	0.635971	0.843724	0.777092	0.548632	0.469688	0.270298	0.294672	0.51929	0.292624	0.607009	0.403665	0.781037	0.561208	0.450039	0.571573	0.756303	0.926767	0.711176
	7.5	0.639665	0.428137	0.271853	0.451462	0.274176	1.02386	1.0184	0.631521	0.970663	0.806837	0.630078	0.438473	0.180856	0.533859	0.506723	0.468472	0.481172	0.48002	0.774995	0.522198	0.476914	0.593196	0.694724	0.785881	0.781478
	9	0.29439	0.264649	0.241873	0.741052	0.220326	0.254159	0.908288	0.574574	0.880107	0.767843	0.587814	0.31033	0.291804	0.228915	0.353503	0.215105	0.348978	0.362516	0.688406	0.265774	0.673101	0.639048	0.607938	0.78211	0.965887
	%SCR+ICR
	Low transcription
		FRT-T											FRT-NT
		WT					hpr1			rnh1rnh201			WT							hpr1			rnh1∆rnh201∆
	Experiment	1	2	3	4	5	1	2	3	1	2	3	1	2	3	4	5	6	7	1	2	3	1	2	3	4
Gal (h)	0	0	0	0	0	0	0	0	0	0	0	0	0	0	0	0	0	0	0	0	0	0	0	0	0	0
	1.5	0.035529	0.077231		0.199452	0.071029	0.06446		0.0756289	0.226307	0.068454		0.114625	0.092176	0.158143	0.072576		0.07936	0.058447			0.050696	0.0379687	0.175777	0.0517408	0.0827443
	3	0.286199	0.234952		0.176423	0.228617	0.0500099	0.159343	0.28688	0.475716	0.134701	0.0921689	0.086269	0.291157	0.325478	0.292922	0.34412	0.6904	0.20408	0.183301	0.117316		0.29011	0.297658	0.252251	0.171249
	4.5	0.234849	0.495849		0.428069	0.345174	0.480042	0.326911	0.536071	0.719575	0.399677	0.399286	0.242585	0.324899	0.403204	0.53656	0.468517	0.629047	0.291867	0.62295	0.28988	0.505147	0.513426	0.815786	0.448087	0.372684
	6	0.308003	0.553735	0.602642	0.395748	0.520966	0.601903	0.345137	0.645162	1.02959	0.48888	0.31812	0.212795	0.37334	0.549575	0.567767	0.654601	0.658091	0.358043	0.90606	0.361355	0.490584	0.62293	0.965927	0.508885	0.486093
	7.5	0.423498	0.61624	0.435781	0.839569	0.344317	0.940127	0.576739	0.909622	1.18352	0.668528	0.376308	0.257648	0.417907	0.671481	0.68762	0.794794	0.525217	0.487995	0.922054	0.503062	0.604372	0.732754	1.31813	0.630797	0.717654
	9	0.481402	0.651651	0.678765	1.00505	0.421236	0.861474	0.683477	0.991341	1.44712	0.759966	0.610805	0.442075	0.643884	0.593919	0.706117	0.831067	0.518637	0.414391	1.13772	0.527647	0.889876	1.03788	1.42939	0.70006	0.92568
