# Supplementary material for: DNA-RNA hybrids at DSBs interfere with repair by homologous recombination
Source: eLife. 2021 Jul 8;10:e69881. doi: 10.7554/eLife.69881 (PMC8289408; doi:10.7554/eLife.69881)
Supplement: Figure 2—figure supplement 2—source data 1. [file elife-69881-fig2-figsupp2-data1.xlsx]

## Sheet: 2-s2
Figure 2-figure supplement 2b
Low transcription			Low transcription			Low transcription			Low transcription			Low transcription
	Strain	WT	Experiment	1		Strain	WT	Experiment	2		Strain	WT	Experiment	3
		FRTt					FRTt					FRTt
	Rec.	Totales	F.R.	Exp.		Rec.	Totales	F.R.	Exp.		Rec.	Totales	F.R.	Exp.
F.D.:	40	40000	1000	x10	F.D.:	40	40000	1000	x10	F.D.:	40	40000	1000	x10
1	17	100	0.17	-3	1	6	89	0.0674157	-3	1	5	40	0.125	-3
2	14	110	0.127273	-3	2	7	56	0.107143	-3	2	38	99	0.0505051	-3
3	15	211	0.07109	-3	3	9	63	0.142857	-3	3	24	33	0.727273	-3
4	25	186	0.134409	-3	4	32	153	0.20915	-3	4	19	60	0.316667	-3
5	58	212	0.273585	-3	5	5	39	0.128205	-3	5	16	63	0.253968	-3
6	36	79	0.455696	-3	6	5	96	0.0520833	-3	6	94	129	0.728682	-3
Y/X	21	149.667	0.140312	-3	Y/X	6.5	82.6667	0.078629	-3	Y/X	21.5	70.6667	0.304245	-3
Freq. Rec.		1.52204	x 10	-4	Freq. Rec.		1.17674	x 10	-4	Freq. Rec.		2.85317	x 10	-4
	Strain	hpr1	Experiment	1		Strain	hpr1	Experiment	2		Strain	hpr1	Experiment	3
		FRTt					FRTt					FRTt
	Rec.	Totales	F.R.	Exp.		Rec.	Totales	F.R.	Exp.		Rec.	Totales	F.R.	Exp.
F.D.:	400	40000	1000	x10	F.D.:	400	40000	1000	x10	F.D.:	400	40000	1000	x10
1	42	118	3.55932	-3	1	62	38	16.3158	-3	1	19	54	3.51852	-3
2	28	84	3.33333	-3	2	108	65	16.6154	-3	2	13	42	3.09524	-3
3	36	40	9	-3	3	156	37	42.1622	-3	3	21	77	2.72727	-3
4	81	139	5.82734	-3	4	83	13	63.8462	-3	4	38	87	4.36782	-3
5	79	70	11.2857	-3	5				-3	5	37	31	11.9355	-3
6	44	99	4.44444	-3	6	115	40	28.75	-3	6	22	41	5.36585	-3
Y/X	43	91.6667	4.69091	-3	Y/X	108	38.6	27.9793	-3	Y/X	21.5	55.3333	3.88554	-3
Freq. Rec.		5.13589	x 10	-3	Freq. Rec.		2.875	x 10	-2	Freq. Rec.		3.94317	x 10	-3
	Strain	rnh1rnh201	Experiment	1		Strain	rnh1rnh201	Experiment	2		Strain	rnh1rnh201	Experiment	3
		FRTt					FRTt					FRTt
	Rec.	Totales	F.R.	Exp.		Rec.	Totales	F.R.	Exp.		Rec.	Totales	F.R.	Exp.
F.D.:	40	40000	1000	x10	F.D.:	40	40000	1000	x10	F.D.:	40	40000	1000	x10
1	92	89	1.03371	-3	1	20	113	0.176991	-3	1				-3
2	118	68	1.73529	-3	2	320	100	3.2	-3	2	82	52	1.57692	-3
3	123	119	1.03361	-3	3	226	108	2.09259	-3	3	5	69	0.0724638	-3
4	92	158	0.582278	-3	4	122	139	0.877698	-3	4	160	1108	0.144404	-3
5	171	124	1.37903	-3	5	37	112	0.330357	-3	5	77	103	0.747573	-3
6	110	137	0.80292	-3	6	129	54	2.38889	-3	6	50	78	0.641026	-3
Y/X	114	115.833	0.984173	-3	Y/X	125.5	104.333	1.20288	-3	Y/X	77	282	0.27305	-3
Freq. Rec.		1.03366	x 10	-3	Freq. Rec.		1.48515	x 10	-3	Freq. Rec.		6.41026	x 10	-4
	Strain	WT	Experiment	1		Strain	WT	Experiment	2		Strain	WT	Experiment	3
		FRTnt					FRTnt					FRTnt
	Rec.	Totales	F.R.	Exp.		Rec.	Totales	F.R.	Exp.		Rec.	Totales	F.R.	Exp.
F.D.:	40	40000	1000	x10	F.D.:	40	40000	1000	x10	F.D.:	40	40000	1000	x10
1	39	119	0.327731	-3	1	7	107	0.0654206	-3	1	23	26	0.884615	-3
2	54	134	0.402985	-3	2	55	129	0.426357	-3	2	15	85	0.176471	-3
3	15	107	0.140187	-3	3				-3	3	18	23	0.782609	-3
4	39	82	0.47561	-3	4	13	61	0.213115	-3	4	10	54	0.185185	-3
5	44	146	0.30137	-3	5	12	49	0.244898	-3	5	26	76	0.342105	-3
6	33	107	0.308411	-3	6	117	99	1.18182	-3	6	31	138	0.224638	-3
Y/X	39	115.833	0.336691	-3	Y/X	13	89	0.146067	-3	Y/X	20.5	67	0.30597	-3
Freq. Rec.		3.18071	x 10	-4	Freq. Rec.		2.44898	x 10	-4	Freq. Rec.		2.83371	x 10	-4
	Strain	hpr1	Experiment	1		Strain	hpr1	Experiment	2		Strain	hpr1	Experiment	3
		FRTnt					FRTnt					FRTnt
	Rec.	Totales	F.R.	Exp.		Rec.	Totales	F.R.	Exp.		Rec.	Totales	F.R.	Exp.
F.D.:	400	40000	1000	x10	F.D.:	400	40000	1000	x10	F.D.:	400	40000	1000	x10
1	25	112	2.23214	-3	1				-3	1	21	63	31	-3
2	21	34	6.17647	-3	2	84	44	19.0909	-3	2	17	57	2.98246	-3
3	58	76	7.63158	-3	3	134	42	31.9048	-3	3	31	67	4.62687	-3
4	74	73	10.137	-3	4				-3	4	9	60	1.5	-3
5	34	130	2.61538	-3	5	64	32	20	-3	5	10	58	1.72414	-3
6	30	77	3.8961	-3	6	98	31	31.6129	-3	6	19	36	5.27778	-3
Y/X	32	83.6667	3.8247	-3	Y/X	91	37.25	24.4295	-3	Y/X	18	56.8333	3.16716	-3
Freq. Rec.		5.03629	x 10	-3	Freq. Rec.		2.58065	x 10	-2	Freq. Rec.		3.80466	x 10	-3
	Strain	rnh1rnh201	Experiment	1		Strain	rnh1rnh201	Experiment	2		Strain	rnh1rnh201	Experiment	3
		FRTnt					FRTnt					FRTnt
	Rec.	Totales	F.R.	Exp.		Rec.	Totales	F.R.	Exp.		Rec.	Totales	F.R.	Exp.
F.D.:	40	40000	1000	x10	F.D.:	40	40000	1000	x10	F.D.:	40	40000	1000	x10
1	31	140	0.221429	-3	1	172	100	1.72	-3	1	29	58	0.5	-3
2	47	182	0.258242	-3	2	294	167	1.76048	-3	2	37	91	0.406593	-3
3	51	56	0.910714	-3	3	246	130	1.89231	-3	3	25	96	0.260417	-3
4	28	95	0.294737	-3	4	187	136	1.375	-3	4	7	60	0.116667	-3
5	25	112	0.223214	-3	5	268	64	4.1875	-3	5	23	73	0.315068	-3
6	109	109	1	-3	6	201	185	1.08649	-3	6	80	68	1.17647	-3
Y/X	39	115.667	0.337176	-3	Y/X	223.5	130.333	1.71483	-3	Y/X	27	74.3333	0.363229	-3
Freq. Rec.		2.76489	x 10	-4	Freq. Rec.		1.74024	x 10	-3	Freq. Rec.		3.60831	x 10	-4
High transcription			High transcription			High transcription			High transcription			High transcription
	Strain	WT	Experiment	1		Strain	WT	Experiment	2		Strain	WT	Experiment	3
		FRTt					FRTt					FRTt
	Rec.	Totales	F.R.	Exp.		Rec.	Totales	F.R.	Exp.		Rec.	Totales	F.R.	Exp.
F.D.:	40	40000	1000	x10	F.D.:	40	40000	1000	x10	F.D.:	40	40000	1000	x10
1	76	123	0.617886	-3	1	45	131	0.343511	-3	1	31	40	0.775	-3
2	22	49	0.44898	-3	2	24	125	0.36	-3	2	22	41	0.756098	-3
3	41	62	0.66129	-3	3	26	142	0.183099	-3	3	76	36	2.11111	-3
4	17	82	0.207317	-3	4				-3	4	25	65	0.384615	-3
5	23	41	0.560976	-3	5				-3	5	42	39	1.07692	-3
6	26	72	0.361111	-3	6				-3	6	38	75	0.506667	-3
Y/X	24.5	71.5	0.342657	-3	Y/X	26	132.667	0.19598	-3	Y/X	34.5	49.3333	0.699324	-3
Freq. Rec.		5.04978	x 10	-4	Freq. Rec.		3.43511	x 10	-4	Freq. Rec.		7.65549	x 10	-4
	Strain	hpr1	Experiment	1		Strain	hpr1	Experiment	2		Strain	hpr1	Experiment	3
		FRTt					FRTt					FRTt
	Rec.	Totales	F.R.	Exp.		Rec.	Totales	F.R.	Exp.		Rec.	Totales	F.R.	Exp.
F.D.:	400	40000	1000	x10	F.D.:	400	40000	1000	x10	F.D.:	400	40000	1000	x10
1	62	138	4.49275	-3	1	23	19	12.1053	-3	1	26	27	9.62963	-3
2	118	77	15.3247	-3	2	11	31	3.54839	-3	2	38	56	6.78571	-3
3	35	43	8.13953	-3	3	20	45	4.44444	-3	3	83	68	12.2059	-3
4	127	172	7.38372	-3	4	19	59	3.22034	-3	4	18	30	6	-3
5	58	179	3.24022	-3	5	21	54	3.88889	-3	5	29	39	7.4359	-3
6	32	36	8.88889	-3	6	143	59	24.2373	-3	6	28	45	6.22222	-3
Y/X	60	107.5	5.5814	-3	Y/X	20.5	44.5	4.60674	-3	Y/X	28.5	44.1667	6.45283	-3
Freq. Rec.		7.76163	x 10	-3	Freq. Rec.		4.16667	x 10	-3	Freq. Rec.		7.11081	x 10	-3
	Strain	rnh1rnh201	Experiment	1		Strain	rnh1rnh201	Experiment	2		Strain	rnh1rnh201	Experiment	3
		FRTt					FRTt					FRTt
	Rec.	Totales	F.R.	Exp.		Rec.	Totales	F.R.	Exp.		Rec.	Totales	F.R.	Exp.
F.D.:	40	40000	1000	x10	F.D.:	40	40000	1000	x10	F.D.:	40	40000	1000	x10
1	410	132	3.10606	-3	1	398	97	4.10309	-3	1	80	54	1.48148	-3
2	290	88	3.29545	-3	2	465	115	4.04348	-3	2	192	47	4.08511	-3
3	500	98	5.10204	-3	3	535	143	3.74126	-3	3	51	29	1.75862	-3
4	214	94	2.2766	-3	4	466	149	3.12752	-3	4	40	24	1.66667	-3
5	400	133	3.00752	-3	5	60	149	0.402685	-3	5	18	57	0.315789	-3
6	350	95	3.68421	-3	6	440	141	3.12057	-3	6	190	55	3.45455	-3
Y/X	375	106.667	3.51562	-3	Y/X	452.5	132.333	3.4194	-3	Y/X	65.5	44.3333	1.47744	-3
Freq. Rec.		3.20076	x 10	-3	Freq. Rec.		3.43439	x 10	-3	Freq. Rec.		1.71264	x 10	-3
	Strain	WT	Experiment	1		Strain	WT	Experiment	2		Strain	WT	Experiment	3
		FRTnt					FRTnt					FRTnt
	Rec.	Totales	F.R.	Exp.		Rec.	Totales	F.R.	Exp.		Rec.	Totales	F.R.	Exp.
F.D.:	40	40000	1000	x10	F.D.:	40	40000	1000	x10	F.D.:	40	40000	1000	x10
1	61	123	0.495935	-3	1	33	98	0.336735	-3	1	56	85	0.658824	-3
2	38	49	0.77551	-3	2	47	159	0.295597	-3	2	70	28	2.5	-3
3	80	62	1.29032	-3	3	22	27	0.814815	-3	3	37	64	0.578125	-3
4	71	82	0.865854	-3	4	34	139	0.244604	-3	4	20	23	0.869565	-3
5	49	41	1.19512	-3	5	187	144	1.29861	-3	5	53	52	1.01923	-3
6	30	72	0.416667	-3	6	66	145	0.455172	-3	6	28	336	0.0833333	-3
Y/X	55	71.5	0.769231	-3	Y/X	40.5	118.667	0.341292	-3	Y/X	45	98	0.459184	-3
Freq. Rec.		8.20682	x 10	-4	Freq. Rec.		3.95954	x 10	-4	Freq. Rec.		7.64194	x 10	-4
	Strain	hpr1	Experiment	1		Strain	hpr1	Experiment	2		Strain	hpr1	Experiment	3
		FRTnt					FRTnt					FRTnt
	Rec.	Totales	F.R.	Exp.		Rec.	Totales	F.R.	Exp.		Rec.	Totales	F.R.	Exp.
F.D.:	400	40000	1000	x10	F.D.:	400	40000	1000	x10	F.D.:	400	40000	1000	x10
1	42	45	9.33333	-3	1	18	38	4.73684	-3	1	19	61	3.11475	-3
2	64	50	12.8	-3	2	22	30	7.33333	-3	2	23	68	3.38235	-3
3	43	52	8.26923	-3	3	19	40	4.75	-3	3	56	78	7.17949	-3
4	41	72	5.69444	-3	4	15	63	2.38095	-3	4	15	34	4.41176	-3
5	42	29	14.4828	-3	5	27	38	7.10526	-3	5	26	46	5.65217	-3
6	42	62	6.77419	-3	6	23	53	4.33962	-3	6	36	48	7.5	-3
Y/X	42	51.6667	8.12903	-3	Y/X	20.5	43.6667	4.69466	-3	Y/X	24.5	55.8333	4.38806	-3
Freq. Rec.		8.80128	x 10	-3	Freq. Rec.		4.74342	x 10	-3	Freq. Rec.		5.03197	x 10	-3
	Strain	rnh1rnh201	Experiment	1		Strain	rnh1rnh201	Experiment	2		Strain	rnh1rnh201	Experiment	3
		FRTnt					FRTnt					FRTnt
	Rec.	Totales	F.R.	Exp.		Rec.	Totales	F.R.	Exp.		Rec.	Totales	F.R.	Exp.
F.D.:	40	40000	1000	x10	F.D.:	40	40000	1000	x10	F.D.:	40	40000	1000	x10
1	42	78	0.538462	-3	1	589	39	15.1026	-3	1	142	32	4.4375	-3
2	64	248	0.258065	-3	2				-3	2	165	36	4.58333	-3
3	59	118	0.5	-3	3	78	158	0.493671	-3	3	304	75	4.05333	-3
4	318	57	5.57895	-3	4	65	116	0.560345	-3	4	238	44	5.40909	-3
5	294	120	2.45	-3	5	547	177	3.0904	-3	5	72	33	2.18182	-3
6	314	66	4.75758	-3	6	487	75	6.49333	-3	6	38	46	0.826087	-3
Y/X	179	114.5	1.56332	-3	Y/X	487	113	4.30973	-3	Y/X	153.5	44.3333	3.46241	-3
Freq. Rec.		1.49423	x 10	-3	Freq. Rec.		3.0904	x 10	-3	Freq. Rec.		4.24542	x 10	-3
Figure 2-figure supplement 2c
Low transcription			Low transcription			Low transcription			Low transcription			Low transcription			Low transcription			Low transcription
	Strain	WT	Experiment	1		Strain	WT	Experiment	2		Strain	WT	Experiment	3		Strain	WT	Experiment	4
		FRTt					FRTt					FRTt					FRTt
	Rec.	Totales	F.R.	Exp.		Rec.	Totales	F.R.	Exp.		Rec.	Totales	F.R.	Exp.		Rec.	Totales	F.R.	Exp.
F.D.:	4000	40000	1000	x10	F.D.:	400	40000	1000	x10	F.D.:	400	40000	1000	x10	F.D.:	400	40000	1000	x10
1	18	55	32.7273	-3	1	20	28	7.14286	-3	1	54	32	16.875	-3	1	108	110	9.81818	-3
2	19	55	34.5455	-3	2	25	94	2.65957	-3	2	35	40	8.75	-3	2	122	81	15.0617	-3
3	16	48	33.3333	-3	3	24	107	2.24299	-3	3	40	41	9.7561	-3	3	168	77	21.8182	-3
4	1	54	1.85185	-3	4	30	97	3.09278	-3	4	216	69	31.3043	-3	4	133	58	22.931	-3
5	13	51	25.4902	-3	5	22	91	2.41758	-3	5	78	48	16.25	-3	5	109	89	12.2472	-3
6	21	45	46.6667	-3	6	79	97	8.14433	-3	6	54	38	14.2105	-3	6	76	45	16.8889	-3
Y/X	17	51.3333	33.1169	-3	Y/X	24.5	85.6667	2.85992	-3	Y/X	54	44.6667	12.0896	-3	Y/X	115.5	76.6667	15.0652	-3
Freq. Rec.		3.30303	x 10	-2	Freq. Rec.		2.87618	x 10	-3	Freq. Rec.		1.52303	x 10	-2	Freq. Rec.		1.59753	x 10	-2
	Strain	hpr1	Experiment	1		Strain	hpr1	Experiment	2		Strain	hpr1	Experiment	3		Strain	hpr1	Experiment	4
		FRTt					FRTt					FRTt					FRTt
	Rec.	Totales	F.R.	Exp.		Rec.	Totales	F.R.	Exp.		Rec.	Totales	F.R.	Exp.		Rec.	Totales	F.R.	Exp.
F.D.:	400	40000	1000	x10	F.D.:	400	40000	1000	x10	F.D.:	400	40000	1000	x10	F.D.:	400	40000	1000	x10
1	124	29	42.7586	-3	1	143	40	35.75	-3	1	44	94	4.68085	-3	1	156	378	4.12698	-3
2	117	25	46.8	-3	2	97	31	31.2903	-3	2	21	67	3.13433	-3	2	121	354	3.41808	-3
3	114	35	32.5714	-3	3	127	27	47.037	-3	3	20	56	3.57143	-3	3	111	367	3.02452	-3
4	95	24	39.5833	-3	4	268	59	45.4237	-3	4	19	45	4.22222	-3	4	134	312	4.29487	-3
5	91	17	53.5294	-3	5	187	32	58.4375	-3	5				-3	5	124	234	5.29915	-3
6	84	11	76.3636	-3	6	275	85	32.3529	-3	6	23	59	3.89831	-3	6	216	300	7.2	-3
Y/X	104.5	23.5	44.4681	-3	Y/X	165	45.6667	36.1314	-3	Y/X	21	64.2	3.27103	-3	Y/X	129	324.167	3.97943	-3
Freq. Rec.		4.47793	x 10	-2	Freq. Rec.		4.05869	x 10	-2	Freq. Rec.		3.89831	x 10	-3	Freq. Rec.		4.21093	x 10	-3
	Strain	rnh1rnh201	Experiment	1		Strain	rnh1rnh201	Experiment	2		Strain	rnh1rnh201	Experiment	3		Strain	rnh1rnh201	Experiment	4
		FRTt					FRTt					FRTt					FRTt
	Rec.	Totales	F.R.	Exp.		Rec.	Totales	F.R.	Exp.		Rec.	Totales	F.R.	Exp.		Rec.	Totales	F.R.	Exp.
F.D.:	4000	40000	1000	x10	F.D.:	400	40000	1000	x10	F.D.:	400	40000	1000	x10	F.D.:	400	40000	1000	x10
1	7	37	18.9189	-3	1	75	70	10.7143	-3	1	138	101	13.6634	-3	1	164	86	19.0698	-3
2	19	62	30.6452	-3	2	47	73	6.43836	-3	2	79	82	9.63415	-3	2	75	26	28.8462	-3
3	28	66	42.4242	-3	3	155	73	21.2329	-3	3	134	57	23.5088	-3	3	113	53	21.3208	-3
4	12	31	38.7097	-3	4	59	84	7.02381	-3	4	47	86	5.46512	-3	4	135	28	48.2143	-3
5	9	30	30	-3	5	96	79	12.1519	-3	5	131	101	12.9703	-3	5	124	40	31	-3
6	15	27	55.5556	-3	6	76	76	10	-3	6	239	62	38.5484	-3	6	150	58	25.8621	-3
Y/X	13.5	42.1667	32.0158	-3	Y/X	75.5	75.8333	9.95604	-3	Y/X	132.5	81.5	16.2577	-3	Y/X	129.5	48.5	26.701	-3
Freq. Rec.		3.46774	x 10	-2	Freq. Rec.		1.03571	x 10	-2	Freq. Rec.		1.33168	x 10	-2	Freq. Rec.		2.73541	x 10	-2
	Strain	WT	Experiment	1		Strain	WT	Experiment	2		Strain	WT	Experiment	3		Strain	WT	Experiment	4
		FRTnt					FRTnt					FRTnt					FRTnt
	Rec.	Totales	F.R.	Exp.		Rec.	Totales	F.R.	Exp.		Rec.	Totales	F.R.	Exp.		Rec.	Totales	F.R.	Exp.
F.D.:	400	40000	1000	x10	F.D.:	400	40000	1000	x10	F.D.:	400	40000	1000	x10	F.D.:	400	40000	1000	x10
1	194	35	55.4286	-3	1	53	58	9.13793	-3	1	23	31	7.41935	-3	1	6	129	0.465116	-3
2	30	28	10.7143	-3	2	223	206	10.8252	-3	2	164	81	20.2469	-3	2	128	92	13.913	-3
3	40	49	8.16327	-3	3	70	140	5	-3	3	144	59	24.4068	-3	3	135	99	13.6364	-3
4	181	34	53.2353	-3	4				-3	4	30	68	4.41176	-3	4	10	96	1.04167	-3
5				-3	5	60	79	7.59494	-3	5	39	40	9.75	-3	5	69	58	11.8966	-3
6	30	19	15.7895	-3	6	234	64	36.5625	-3	6	156	105	14.8571	-3	6	180	76	23.6842	-3
Y/X	40	33	12.1212	-3	Y/X	70	109.4	6.39854	-3	Y/X	91.5	64	14.2969	-3	Y/X	98.5	91.6667	10.7455	-3
Freq. Rec.		1.57895	x 10	-2	Freq. Rec.		9.13793	x 10	-3	Freq. Rec.		1.23036	x 10	-2	Freq. Rec.		1.27665	x 10	-2
	Strain	hpr1	Experiment	1		Strain	hpr1	Experiment	2		Strain	hpr1	Experiment	2		Strain	hpr1	Experiment	4
		FRTnt					FRTnt					FRTnt					FRTnt
	Rec.	Totales	F.R.	Exp.		Rec.	Totales	F.R.	Exp.		Rec.	Totales	F.R.	Exp.		Rec.	Totales	F.R.	Exp.
F.D.:	400	40000	1000	x10	F.D.:	400	40000	1000	x10	F.D.:	400	40000	1000	x10	F.D.:	400	40000	1000	x10
1	92	33	27.8788	-3	1	156	25	62.4	-3	1				-3	1	165	56	31	-3
2	110	15	73.3333	-3	2	138	27	51.1111	-3	2	84	44	19.0909	-3	2	127	35	36.2857	-3
3	100	32	31.25	-3	3	152	51	29.8039	-3	3	134	42	31.9048	-3	3	190	42	45.2381	-3
4	181	15	120.667	-3	4	200	26	76.9231	-3	4				-3	4	98	17	57.6471	-3
5	98	24	40.8333	-3	5	121	49	24.6939	-3	5	64	32	20	-3	5	122	28	43.5714	-3
6	144	33	43.6364	-3	6	193	37	52.1622	-3	6	98	31	31.6129	-3	6	93	12	77.5	-3
Y/X	105	25.3333	41.4474	-3	Y/X	154	35.8333	42.9767	-3	Y/X	91	37.25	24.4295	-3	Y/X	124.5	31.6667	39.3158	-3
Freq. Rec.		4.22348	x 10	-2	Freq. Rec.		5.16366	x 10	-2	Freq. Rec.		2.58065	x 10	-2	Freq. Rec.		4.44048	x 10	-2
	Strain	rnh1rnh201	Experiment	1		Strain	rnh1rnh201	Experiment	2		Strain	rnh1rnh201	Experiment	3		Strain	rnh1rnh201	Experiment	4
		FRTnt					FRTnt					FRTnt					FRTnt
	Rec.	Totales	F.R.	Exp.		Rec.	Totales	F.R.	Exp.		Rec.	Totales	F.R.	Exp.		Rec.	Totales	F.R.	Exp.
F.D.:	4000	40000	1000	x10	F.D.:	400	40000	1000	x10	F.D.:	400	40000	1000	x10	F.D.:	400	40000	1000	x10
1	15	22	68.1818	-3	1				-3	1	87	56	15.5357	-3	1	152	71	21.4085	-3
2	23	70	32.8571	-3	2	41	82	5	-3	2	149	69	21.5942	-3	2	46	50	9.2	-3
3	16	40	40	-3	3	24	88	2.72727	-3	3	166	69	24.058	-3	3	166	66	25.1515	-3
4	9	59	15.2542	-3	4	83	57	14.5614	-3	4	78	7	111.429	-3	4	86	57	15.0877	-3
5	13	46	28.2609	-3	5	79	91	8.68132	-3	5	191	55	34.7273	-3	5	113	63	17.9365	-3
6	26	34	76.4706	-3	6	132	56	23.5714	-3	6	194	79	24.557	-3	6	100	67	14.9254	-3
Y/X	15.5	45.1667	34.3173	-3	Y/X	79	74.8	10.5615	-3	Y/X	157.5	55.8333	28.209	-3	Y/X	106.5	62.3333	17.0856	-3
Freq. Rec.		3.64286	x 10	-2	Freq. Rec.		8.68132	x 10	-3	Freq. Rec.		2.43075	x 10	-2	Freq. Rec.		1.65121	x 10	-2
High transcription			High transcription			High transcription			High transcription			High transcription			High transcription			High transcription
	Strain	WT	Experiment	1		Strain	WT	Experiment	2		Strain	WT	Experiment	3		Strain	WT	Experiment	4
		FRTt					FRTt					FRTt					FRTt
	Rec.	Totales	F.R.	Exp.		Rec.	Totales	F.R.	Exp.		Rec.	Totales	F.R.	Exp.		Rec.	Totales	F.R.	Exp.
F.D.:	400	40000	1000	x10	F.D.:	400	40000	1000	x10	F.D.:	400	40000	1000	x10	F.D.:	400	40000	1000	x10
1	21	48	4.375	-3	1	143	79	18.1013	-3	1	85	50	17	-3	1	71	119	5.96639	-3
2	18	15	12	-3	2	220	74	29.7297	-3	2	48	48	10	-3	2	96	30	32	-3
3	96	44	21.8182	-3	3	83	59	14.0678	-3	3	25	30	8.33333	-3	3	49	87	5.63218	-3
4	47	41	11.4634	-3	4	26	70	3.71429	-3	4	76	46	16.5217	-3	4	137	117	11.7094	-3
5	26	69	3.76812	-3	5	46	78	5.89744	-3	5	66	54	12.2222	-3	5	78	112	6.96429	-3
6	87	43	20.2326	-3	6	117	70	16.7143	-3	6	17	18	9.44444	-3	6	134	70	19.1429	-3
Y/X	36.5	43.3333	8.42308	-3	Y/X	100	71.6667	13.9535	-3	Y/X	57	41	13.9024	-3	Y/X	87	89.1667	9.75701	-3
Freq. Rec.		1.17317	x 10	-2	Freq. Rec.		1.5391	x 10	-2	Freq. Rec.		1.11111	x 10	-2	Freq. Rec.		9.33684	x 10	-3
	Strain	hpr1	Experiment	1		Strain	hpr1	Experiment	2		Strain	hpr1	Experiment	2		Strain	hpr1	Experiment	4
		FRTt					FRTt					FRTt					FRTt
	Rec.	Totales	F.R.	Exp.		Rec.	Totales	F.R.	Exp.		Rec.	Totales	F.R.	Exp.		Rec.	Totales	F.R.	Exp.
F.D.:	400	40000	1000	x10	F.D.:	400	40000	1000	x10	F.D.:	400	40000	1000	x10	F.D.:	400	40000	1000	x10
1	59	25	23.6	-3	1	99	38	26.0526	-3	1	51	20	25.5	-3	1	80	33	24.2424	-3
2	63	15	42	-3	2	139	43	32.3256	-3	2	60	29	20.6897	-3	2	61	25	24.4	-3
3	70	32	21.875	-3	3	73	32	22.8125	-3	3	35	34	10.2941	-3	3	66	17	38.8235	-3
4	42	28	15	-3	4	175	81	21.6049	-3	4	44	20	22	-3	4	80	36	22.2222	-3
5	82	32	25.625	-3	5	79	35	22.5714	-3	5	49	34	14.4118	-3	5	90	26	34.6154	-3
6	42	13	32.3077	-3	6	81	27	30	-3	6	83	34	24.4118	-3	6	69	299	2.30769	-3
Y/X	61	24.1667	25.2414	-3	Y/X	90	42.6667	21.0938	-3	Y/X	50	28.5	17.5439	-3	Y/X	74.5	72.6667	10.2523	-3
Freq. Rec.		2.46125	x 10	-2	Freq. Rec.		2.44326	x 10	-2	Freq. Rec.		2.13448	x 10	-2	Freq. Rec.		2.43212	x 10	-2
	Strain	rnh1rnh201	Experiment	1		Strain	rnh1rnh201	Experiment	2		Strain	rnh1rnh201	Experiment	3		Strain	rnh1rnh201	Experiment	4
		FRTt					FRTt					FRTt					FRTt
	Rec.	Totales	F.R.	Exp.		Rec.	Totales	F.R.	Exp.		Rec.	Totales	F.R.	Exp.		Rec.	Totales	F.R.	Exp.
F.D.:	400	40000	1000	x10	F.D.:	400	40000	1000	x10	F.D.:	400	40000	1000	x10	F.D.:	400	40000	1000	x10
1	55	65	8.46154	-3	1	136	84	16.1905	-3	1	35	58	6.03448	-3	1	59	140	4.21429	-3
2	7	12	5.83333	-3	2	110	63	17.4603	-3	2	32	80	4	-3	2	87	83	10.4819	-3
3	89	51	17.451	-3	3	93	65	14.3077	-3	3	44	76	5.78947	-3	3	24	55	4.36364	-3
4	76	57	13.3333	-3	4	72	102	7.05882	-3	4	77	93	8.27957	-3	4	74	28	26.4286	-3
5	17	59	2.88136	-3	5	95	98	9.69388	-3	5	28	74	3.78378	-3	5	123	75	16.4	-3
6	11	36	3.05556	-3	6	94	89	10.5618	-3	6	56	145	3.86207	-3	6	96	94	10.2128	-3
Y/X	36	46.6667	7.71429	-3	Y/X	94.5	83.5	11.3174	-3	Y/X	39.5	87.6667	4.5057	-3	Y/X	80.5	79.1667	10.1684	-3
Freq. Rec.		7.14744	x 10	-3	Freq. Rec.		1.24347	x 10	-2	Freq. Rec.		4.89474	x 10	-3	Freq. Rec.		1.03473	x 10	-2
	Strain	WT	Experiment	1		Strain	WT	Experiment	2		Strain	WT	Experiment	3		Strain	WT	Experiment	4
		FRTnt					FRTnt					FRTnt					FRTnt
	Rec.	Totales	F.R.	Exp.		Rec.	Totales	F.R.	Exp.		Rec.	Totales	F.R.	Exp.		Rec.	Totales	F.R.	Exp.
F.D.:	400	40000	1000	x10	F.D.:	400	40000	1000	x10	F.D.:	400	40000	1000	x10	F.D.:	400	40000	1000	x10
1	31	36	8.61111	-3	1	61	50	12.2	-3	1	39	56	6.96429	-3	1	73	82	8.90244	-3
2	13	21	6.19048	-3	2	104	89	11.6854	-3	2	87	76	11.4474	-3	2	98	59	16.6102	-3
3	15	5	30	-3	3	56	46	12.1739	-3	3	24	31	7.74194	-3	3	106	138	7.68116	-3
4	22	18	12.2222	-3	4	26	64	4.0625	-3	4	67	62	10.8065	-3	4	66	60	11	-3
5	61	41	14.878	-3	5	153	78	19.6154	-3	5	158	79	20	-3	5	86	96	8.95833	-3
6	13	15	8.66667	-3	6	69	77	8.96104	-3	6	76	72	10.5556	-3	6	127	86	14.7674	-3
Y/X	18.5	22.6667	8.16176	-3	Y/X	65	67.3333	9.65347	-3	Y/X	71.5	62.6667	11.4096	-3	Y/X	92	86.8333	10.595	-3
Freq. Rec.		1.04444	x 10	-2	Freq. Rec.		1.19297	x 10	-2	Freq. Rec.		1.0681	x 10	-2	Freq. Rec.		9.97917	x 10	-3
	Strain	hpr1	Experiment	1		Strain	hpr1	Experiment	2		Strain	hpr1	Experiment	3		Strain	hpr1	Experiment	4
		FRTnt					FRTnt					FRTnt					FRTnt
	Rec.	Totales	F.R.	Exp.		Rec.	Totales	F.R.	Exp.		Rec.	Totales	F.R.	Exp.		Rec.	Totales	F.R.	Exp.
F.D.:	400	40000	1000	x10	F.D.:	400	40000	1000	x10	F.D.:	400	40000	1000	x10	F.D.:	400	40000	1000	x10
1	42	20	21	-3	1	88	38	23.1579	-3	1	27	21	12.8571	-3	1	60	15	40	-3
2	39	12	32.5	-3	2	116	40	29	-3	2	36	23	15.6522	-3	2	73	17	42.9412	-3
3	70	18	38.8889	-3	3	88	27	32.5926	-3	3	47	24	19.5833	-3	3	54	32	16.875	-3
4	70	33	21.2121	-3	4				-3	4	33	32	10.3125	-3	4	99	42	23.5714	-3
5	81	40	20.25	-3	5	105	28	37.5	-3	5	59	40	14.75	-3	5	108	37	29.1892	-3
6	45	30	15	-3	6	124	51	24.3137	-3	6	49	36	13.6111	-3	6	48	37	12.973	-3
Y/X	57.5	25.5	22.549	-3	Y/X	105	36.8	28.5326	-3	Y/X	41.5	29.3333	14.1477	-3	Y/X	66.5	30	22.1667	-3
Freq. Rec.		2.11061	x 10	-2	Freq. Rec.		2.9	x 10	-2	Freq. Rec.		1.41806	x 10	-2	Freq. Rec.		2.63803	x 10	-2
	Strain	rnh1rnh201	Experiment	1		Strain	rnh1rnh201	Experiment	2		Strain	rnh1rnh201	Experiment	3		Strain	rnh1rnh201	Experiment	4
		FRTnt					FRTnt					FRTnt					FRTnt
	Rec.	Totales	F.R.	Exp.		Rec.	Totales	F.R.	Exp.		Rec.	Totales	F.R.	Exp.		Rec.	Totales	F.R.	Exp.
F.D.:	400	40000	1000	x10	F.D.:	400	40000	1000	x10	F.D.:	400	40000	1000	x10	F.D.:	400	40000	1000	x10
1	70	30	23.3333	-3	1	68	68	10	-3	1	128	36	35.5556	-3	1	181	35	51.7143	-3
2	73	53	13.7736	-3	2	66	115	5.73913	-3	2	48	101	4.75248	-3	2	167	76	21.9737	-3
3	70	45	15.5556	-3	3	180	68	26.4706	-3	3	25	85	2.94118	-3	3	11	87	1.26437	-3
4	45	24	18.75	-3	4	82	54	15.1852	-3	4	56	80	7	-3	4	21	27	7.77778	-3
5	28	80	3.5	-3	5	63	92	6.84783	-3	5				-3	5	82	89	9.21348	-3
6	43	66	6.51515	-3	6	200	61	32.7869	-3	6	89	57	15.614	-3	6	38	92	4.13043	-3
Y/X	57.5	49.6667	11.5772	-3	Y/X	75	76.3333	9.82533	-3	Y/X	56	71.8	7.79944	-3	Y/X	60	67.6667	8.867	-3
Freq. Rec.		1.46646	x 10	-2	Freq. Rec.		1.25926	x 10	-2	Freq. Rec.		7	x 10	-3	Freq. Rec.		8.49563	x 10	-3
