# Supplementary material for: DNA-RNA hybrids at DSBs interfere with repair by homologous recombination
Source: eLife. 2021 Jul 8;10:e69881. doi: 10.7554/eLife.69881 (PMC8289408; doi:10.7554/eLife.69881)
Supplement: Figure 2—source data 1. [file elife-69881-fig2-data1.xlsx]

## Sheet: Fig. 2
Figure 2b														Fig. 1b WT FRT-T lines 8-14				Fig. 1b rnh1∆ rnh201∆ FRT-T lines 15-21				Fig. 1b hpr1∆ FRT-T lines 8-14					Fig. 1b WT FRT-NT lines 8-14				Fig. 1b rnh1∆ rnh201∆ FRT-NT lines 8-14				Fig. 1b hpr1∆ FRT-NT lines 8-14
	Repair ratio
	High transcription
	FRT-T
		WT					hpr1			rnh1rnh201
	Experiments	1	2	3	4	5	1	2	3	1	2	3
Gal (h)	0	0	0	0	0	0	0	0	0	0	0	0
	1.5	0.29206	0.27826	0.44978	0.60488	0.25848	0.380304	0	0.496432	0.362072	0.287873	0
	3	0.43278	0.39058	0.3629	0.29465	0.531	0.457929	0	0.543846	0.416129	0.0555222	0.366917
	4.5	0.50188	0.52836	0.46072	0.79022	0.51575	0.482917	0.294951	0.619936	0.507719	0.382893	0.501731
	6	0.49704	0.61831	0.4549	0.8676	0.65122	0.565369	0.304774	0.640558	0.586211	0.378866	0.540346
	7.5	0.60648	0.573	0.48326	0.90401	0.95151	0.555587	0.614947	0.664618	0.587398	0.465448	0.619425
	9	0.68338	0.69569	0.52751	0.70514	0.81495	0.573926	0.935546	0.7107	0.625895	0.477086	0.749
	Repair ratio
	High transcription
	FRT-NT
		WT			hpr1			rnh1rnh201
	Experiments	1	2	3	1	2	3	1	2	3
Gal (h)	0	0	0	0	0	0	0	0	0	0
	1.5	0.62397	0.49582	0.4742	0.385212	0.591101	0.283521	0.359423	0.583546	0.582205
	3	0.67817	0.49156	0.56505	0.472347	0.510161	0.645057	0.388153	0.62459	0.377373
	4.5	0.58457	0.58327	0.57537	0.539149	0.499366	0.722472	0.334176	0.608968	0.504831
	6	0.56387	0.61044	0.60948	0.592923	0.512694	0.674311	0.498105	0.618388	0.413017
	7.5	0.69588	0.63847	0.55698	0.58931	0.539994	0.731287	0.434025	0.682229	0.444445
	9	0.71577	0.71869	0.63415	0.617853	0.57487	0.694327	0.48719	0.748102	0.481883
Figure 2c
	Repair ratio
	Low transcription
	FRT-T															Fig. 1c WT FRT-T lines 1-7				Fig. 1c rnh1∆ rnh201∆ FRT-T lines 8-15				Fig. 1c hpr1∆ FRT-T lines 1-7				Fig. 1c WT FRT-NT lines 1-7				Fig. 1c rnh1∆ rnh201∆ FRT-NT lines 1-7				Fig. 1c hpr1∆ FRT-NT lines 1-7
		WT					hpr1			rnh1rnh201
	Experiments	1	2	3	4	5	1	2	3	1	2	3
Gal (h)	0	0	0	0	0	0	0	0	0	0	0	0
	1.5	0.21799	0.43269		0.65847	0.25731	0.431082		0.462842	0.35331	0.309744
	3	0.37222	0.44633		0.35598	0.37954	0.24588	0.277708	0.509154	0.403188	0.300677	0.371041
	4.5	0.31911	0.53467		0.51789	0.44538	0.453951	0.316082	0.498987	0.461328	0.459893	0.494234
	6	0.36184	0.53468	0.64045	0.70892	0.49951	0.497562	0.297761	0.503587	0.549608	0.38617	0.367025
	7.5	0.39834	0.59005	0.61583	0.65031	0.5567	0.478683	0.361559	0.590226	0.549405	0.453127	0.37392
	9	0.62053	0.71118	0.73728	0.5756	0.65658	0.772184	0.429383	0.633075	0.621822	0.497422	0.509591
	Repair ratio
	Low transcription
	FRT-NT
		WT							hpr1			rnh1rnh201
	Experiments	1	2	3	4	5	6	7	1	2	3	1	2	3	4
Gal (h)	0	0	0	0	0	0	0	0	0	0	0	0	0	0	0
	1.5	0.41964	0.32449	0.64566	0.53992		0.29389	0.27002			0.346164	0.240541	0.47761	0.274138	0.498174
	3	0.22333	0.45385	0.59451	0.50891	0.78251	0.45196	0.42854	0.439653	0.382191		0.454263	0.601511	0.373933	0.351726
	4.5	0.40255	0.53414	0.6788	0.53404	0.61113	0.46706	0.47992	0.502202	0.484125	0.492222	0.537301	0.619696	0.38715	0.418269
	6	0.3118	0.58005	0.65097	0.5223	0.69107	0.52019	0.47005	0.537053	0.391686	0.521552	0.521498	0.560858	0.354463	0.406001
	7.5	0.37012	0.69795	0.55709	0.57573	0.62916	0.52188	0.50412	0.543328	0.490668	0.558938	0.552626	0.654857	0.445265	0.478713
	9	0.58755	0.68814	0.7218	0.66639	0.79439	0.59777	0.53339	0.623024	0.665028	0.569347	0.618917	0.7016	0.472321	0.489372
