# Supplementary material for: DNA-RNA hybrids at DSBs interfere with repair by homologous recombination
Source: eLife. 2021 Jul 8;10:e69881. doi: 10.7554/eLife.69881 (PMC8289408; doi:10.7554/eLife.69881)
Supplement: Figure 3—figure supplement 1—source data 1. [file elife-69881-fig3-figsupp1-data1.xlsx]

## Sheet: 3-s1
Figure 3-figure supplement 1
	%S9.6 Inmunoprecipitation
	FRT-T								FRT-NT
Experiment	WT	WT +RH	rnh1 rnh201	rnh1 rnh2+RH	WT +FLPm	WT +FLPm +RH	rnh1rnh2+FLPm	rnh1rnh2+FLPm +RH	WT	WT +RH	rnh1 rnh2	rnh1 rnh2+RH	WT +FLPm	WT +FLPm +RH	rnh1rnh2+FLPm	rnh1rnh2+FLPm +RH
1	0.0904916	0.0193877	0.0490885	0.0107625	0.0683403	0.0279175	0.488473	0.0107625	0.0198462	0.0143371	0.0391097	0.0240376	0.141515	0.0430195	0.638285	0.0613193
2	0.209889	0.133828	0.322219	0.169168	2.37325	0.679581	2.13795	0.169168	0.0416157	0.134459	0.470583	0.448095	0.43483	0.166657	0.596064	0.210385
3	0.00831547	0.0189864	0.0655465	0.0122639	0.128996	0.0395739	2.47927	0.0122639	0.03387	0.00960595	0.0595373	0.0036157	0.183909	0.0388916	1.34563	0.026746
4	0.0233825	0.00422713	0.0737543	0.0126952	0.237926	0.0808839	0.236489	0.0126952	0.128265	0.0175977	0.0535182	0.00611392	0.682689	0.205695	0.631765	0.0326618
