# Supplementary material for: DNA-RNA hybrids at DSBs interfere with repair by homologous recombination
Source: eLife. 2021 Jul 8;10:e69881. doi: 10.7554/eLife.69881 (PMC8289408; doi:10.7554/eLife.69881)
Supplement: Figure 3—source data 1. [file elife-69881-fig3-data1.xlsx]

## Sheet: Fig. 3
Figure 3a
	FRT-T
	%S9.6 Inmunoprecipitation
Experiment	WT	WT +RH	rnh1 rnh201	rnh1 rnh201 +RH	hpr1	hpr1 +RH	WT +FLPm	WT +FLPm +RH	rnh1rnh201+FLPm	rnh1rnh201 +FLPm +RH	hpr1+FLPm	hpr1 + FLPm +RH
1	0.128912	0.0215015	0.0977984	0.00994977	0.230973	0.141844	0.207778	0.017472	0.389468	0.0204063	0.647822	0.412447
2	0.15625	0.0338666	0.257596	0.0819326	0.580896	0.108225	0.221527	0.0465125	0.690558	0.0421478	0.330211	0.07058
3	0.132298	0.0068545	0.231286	0.01055	0.366911	0.153691	0.133924	0.0129311	0.745727	0.0124908	0.571586	0.179399
4	0.289193	0.0199702			0.25055	0.0193179	0.309536	0.0209554			0.199662	0.0142845
5	0.154534	0.024609					0.085536	0.019726
6	0.25475	0.156429					0.293418	0.197916
7	0.198598	0.048486					0.332205	0.073988
8	0.219898	0.118191					0.144465	0.131621
9	0.15175	0.0148731						0.0232206
	FRT-NT
	%S9.6 Inmunoprecipitation
Experiment	WT	WT +RH	rnh1 rnh201	rnh1 rnh201 +RH	hpr1	hpr1 +RH	WT +FLPm	WT +FLPm +RH	rnh1rnh201+FLPm	rnh1rnh201 +FLPm +RH	hpr1+FLPm	hpr1 + FLPm +RH
1	0.0794104	0.0145198	0.101624	0.0226119	0.289799	0.229968	0.217846	0.0288103	0.453839	0.0515397	0.42985	0.128352
2	0.147799	0.0160018	0.280952	0.0620233	0.196699	0.0170787	0.286279	0.0530421	0.456273	0.0530666	0.306807	0.16574
3	0.217786	0.00699185	0.228746	0.0033369	0.561125	0.204018	0.137217	0.0182331	0.630723	0.00999691	0.544887	0.0316683
4	0.202966	0.0136485			0.25055	0.0105489	0.25933	0.023858			0.209075
5	0.144189	0.028737					0.193119	0.02899
6	0.26272	0.139587					0.341114	0.207633
7	0.152808	0.043608					0.150692	0.07934
8	0.255359	0.127615					0.333572	0.188854
9	0.115788	0.00921161					0.149327	0.0184002
Figure 3b
	FRT-T
	%S9.6 Inmunoprecipitation
Experiment	WT	WT +RH	rnh1 rnh201	rnh1 rnh201 +RH	WT +FLPm	WT +FLPm +RH	rnh1rnh2+FLPm	rnh1rnh2+FLPm +RH
1	0.0649036	0.00651093	0.0414533	0.0355722	0.0577525	0.00606363	0.0692823	0.00713861
2	0.247587	0.177111	0.26549	0.117279	0.414907	0.178032	0.467685	0.192695
3	0.278333	0.187517	0.386993	0.203367	0.38657	0.324573	0.565339	0.172384
4	0.298939	0.169372	0.181304	0.085225	0.249854	0.0960673	0.233938	0.135105
	FRT-NT
	%S9.6 Inmunoprecipitation
Experiment	WT	WT +RH	rnh1 rnh201	rnh1 rnh201+RH	WT +FLPm	WT +FLPm +RH	rnh1rnh201+FLPm	rnh1rnh201+FLPm +RH
1	0.0554981	0.00928734	0.0243625	0.0142556	0.0334892	0.0152833	0.0691012	0.0151489
2	0.257377	0.143914	0.422699	0.0985038	0.422699	0.19739	0.260487	0.0863843
3	0.215146	0.133001	0.21725	0.0834789	0.427998	0.112006	0.190436	0.0960636
4	0.357081	0.120728	0.265619	0.105432	0.325778	0.127501	0.198539	0.0580476
Figure 3c
	FRT-T
	%S9.6 Inmunoprecipitation
Experiment	WT	WT +RH	rnh1 rnh201	rnh1 rnh201+RH	hpr1	hpr1+RH	WT +FLPm	WT +FLPm +RH	rnh1rnh201+FLPm	rnh1rnh201 +FLPm +RH	hpr1+FLPm	hpr1 + FLPm +RH
1	0.0683971	0.00840836	0.0705098	0.00495465	1.4023	1.10606	0.180538	0.00801226	0.182137	0.00984976	3.61347	2.27688
2	1.32295	0.0541701	1.36314	0.156408	4.3514	0.68027	5.08894	0.280697	1.12115	0.146552	1.84244	0.513243
3	0.714238	0.0110926	0.870305	0.0136487	1.55381	0.504925	0.920051	0.0292506	2.32916	0.0482242	1.22442	0.42167
4	1.32062	0.0238164					2.12359	0.0302744
5	0.509498	0.0161803					0.359203	0.00905708
6	1.07327	0.649835					1.23654	0.842958
7	0.820145	0.208941					1.2375	0.567187
8	1.05184	0.679243						0.766897
	FRT-NT
	%S9.6 Inmunoprecipitation
Experiment	WT	WT +RH	rnh1 rnh201	rnh1 rnh201+RH	hpr1	hpr1+RH	WT +FLPm	WT +FLPm +RH	rnh1rnh201+FLPm	rnh1rnh201 +FLPm +RH	hpr1+FLPm	hpr1 + FLPm +RH
1	0.0866462	0.0061965	0.061595	0.010985	2.28992	1.45303	0.242978	0.0112905	0.168316	0.0288447	2.61675	1.65455
2	0.388258	0.0658707	1.36314	0.156408	1.05906	0.08987	2.93995	0.115145	1.12115	0.146552	1.73928	0.854237
3	1.19224	0.00884288	1.23393	0.00630018	2.00851	1.01353	0.825514	0.0450535	1.03613	0.0793185	1.98367	0.741992
4	0.829913	0.0151591					2.31452	0.0358111
5	0.422304	0.027454					1.46831	0.0134309
6	1.50256	0.963796					2.60306	1.49147
7	0.713731	0.193419					0.800204	0.678452
8	1.04874	0.505123					1.09981	0.704001
