# Supplementary material for: DNA-RNA hybrids at DSBs interfere with repair by homologous recombination
Source: eLife. 2021 Jul 8;10:e69881. doi: 10.7554/eLife.69881 (PMC8289408; doi:10.7554/eLife.69881)
Supplement: Figure 4—figure supplement 1—source data 1. [file elife-69881-fig4-figsupp1-data1.xlsx]

## Sheet: 4-s1
Figure 4-figure supplement 1a
		%DSB								%SCR+ICR
		WT				rnh1 rnh201				WT				rnh1 rnh201
	Experiment	1	2	3	4	1	2	3	4	1	2	3	4	1	2	3	4
Gal(h)	0	0	0	0	0	0	0	0	0	0	0	0	0	0	0	0	0
	0.5	20.6373	9.22898	7.78403	12.0072	7.96075	6.97931	8.80578	5.60566	0.08092	0	0.15389	0.22572	0.073196	0.0260122	0.0725587	0
	1	48.0494	28.7766	34.3021	42.6058	23.8809	24.6136	24.3089	25.6272	2.15664	1.49673	4.94213	2.57116	1.08937	1.06163	1.41103	0.794225
	1.5	57.6563	36.7602	41.3049	51.6312	35.3694	34.7736	32.2606	36.4324	10.0229	7.88625	9.98786	8.07719	5.78583	4.57956	4.03196	3.74281
	2	54.347	39.7606	36.9574	52.351	39.1977	40.3407	36.4328	41.0407	16.2412	11.2672	16.1795	14.6502	8.8298	6.44723	7.86549	7.27899
	3	41.0598	38.4875	24.0257	33.3978	36.4418	37.2577	35.2323	33.6788	19.5828	16.1787	19.882	23.7762	13.1096	10.7653	12.0474	14.009
	4.5	16.0902	21.3508	12.1355	13.0718	21.7387	26.2215	21.1599	22.9875	19.9006	18.1098	15.8801	20.167	13.9091	12.5497	11.9483	14.1495
	6	5.08822	11.0302	6.96244	6.36674	12.5109	16.9704	9.98191	13.0598	17.9349	17.6791	15.8969	19.1269	13.5257	13.0526	11.5676	12.9665
	7.5	1.39807	5.30689	3.35672	1.55081	6.1433	6.10778	3.51599	4.13502	16.4909	15.124	16.8891	17.3165	12.9624	12.0233	12.3996	11.4862
Figure 4-figure supplement 1b
		%DSB						%SCR+ICR
		WT			rnh1 rnh201			WT			rnh1 rnh201
	Experiment	1	2	3	1	2	3	1	2	3	1	2	3
Gal(h)	0	0	0	0	0	0	0	0	0	0	0	0	0
	0.5	18.1565	11.944	6.35734	14.0426	7.5089	7.68172	0	0	0.777581	0.063282	0	0.31432
	1	39.5717	46.1443	15.6801	31.579	29.3151	14.9979	2.68866	1.74545	0.608	1.11728	0.775234	0.406747
	1.5	50.758	56.8311	24.0058	35.9367	40.3181	24.4401	6.10927	6.64388	1.77307	3.37695	2.68865	2.10264
	2	47.937	60.7893	28.8924	41.4857	48.6714	27.5912	11.0658	11.8521	4.29531	8.0523	5.41116	4.51092
	3	36.7124	32.5533	37.8763	35.5598	46.798	27.4537	16.2226	21.328	6.70971	9.38877	10.3947	6.11833
	4.5	20.7114	19.7635	30.5347	23.2373	35.3818	21.0889	17.4916	19.7596	9.96083	10.1048	10.5524	7.07439
	6	9.64761	9.43485	16.7777	13.8553	20.7623	12.9865	16.9128	19.4265	11.5186	10.2442	12.1527	8.58607
	7.5	2.67043	1.62016	7.26255	6.67945	9.31004	7.99789	21.0828	19.729	11.0205	10.4985	11.5626	8.72619
Figure 4-figure supplement 1c
		%DSB						%SCR+ICR
		WT			hpr1			WT			hpr1
	Experiment	1	2	3	1	2	3	1	2	3	1	2	3
Gal(h)	0	0	0	0	0	0	0	0	0	0	0	0	0
	0.5	3.94058	7.8626	7.17093	0.225357	0.510085	2.177	0.0476179	0.0192157	0	0	0.0238019	0
	1	16.2003	8.49797	30.1423	2.33767	3.53846	11.062	0.637089	1.08742	0.549247	0.0349747	0.0620915	0.0376932
	1.5	24.3266	28.4624	38.9698	5.75263	7.92909	19.6893	3.31886	1.13542	3.29495	0.429559	0.478093	1.1149
	2	21.6486	30.6127	43.5044	8.57856	12.348	23.9583	7.08025	4.68687	7.51411	1.3723	1.70593	2.67358
	3	18.9818	22.0586	40.103	14.6487	20.4709	26.1168	11.3159	9.03809	12.2485	3.73785	4.01928	7.04965
	4.5	14.8734	18.4489	24.1528	19.4383	22.1501	22.921	13.524	14.1234	14.4968	6.82678	6.87643	9.72931
	6	8.32311	10.0256	10.1732	11.9471	15.0472	14.2869	14.0149	13.6104	16.1404	8.40214	7.99474	12.4971
