# Supplementary material for: DNA-RNA hybrids at DSBs interfere with repair by homologous recombination
Source: eLife. 2021 Jul 8;10:e69881. doi: 10.7554/eLife.69881 (PMC8289408; doi:10.7554/eLife.69881)
Supplement: Figure 4—source data 1. [file elife-69881-fig4-data1.xlsx]

## Sheet: Fig. 4
Figure 4b										Fig. 4b WT lines 1-9				Fig. 4b rnh1∆ rnh201∆ lines 1-9
	Repair ratio
	High transcription
		WT				rnh1 rnh201
	Experiment	1	2	3	4	1	2	3	4
Gal (h)	0	0	0	0	0	0	0	0	0
	0.5	0.00391	0	0.01939	0.01845	0.009111	0.003713	0.008173	0
	1	0.04296	0.04944	0.12593	0.05691	0.043627	0.041348	0.054861	0.0300598
	1.5	0.14809	0.17664	0.19472	0.13528	0.140586	0.116371	0.111096	0.093162
	2	0.23008	0.22081	0.30449	0.21866	0.183849	0.137797	0.177557	0.150642
	3	0.32292	0.29596	0.45281	0.41586	0.264566	0.22417	0.254812	0.293765
	4.5	0.55294	0.45893	0.56683	0.60673	0.390182	0.323685	0.360887	0.381008
	6	0.77899	0.6158	0.69542	0.75026	0.519487	0.434754	0.536792	0.498208
	7.5	0.92185	0.74025	0.8342	0.9178	0.678458	0.663132	0.779086	0.735295
Figure 4c	Repair ratio
	Low transcription									Fig. 4c WT lines 10-19				Fig. 4c rnh1∆ rnh201∆ lines 10-19
		WT			rnh1 rnh201
	Experiment	1	2	3	1	2	3
Gal (h)	0	0	0	0	0	0	0
	0.5	0	0	0.108982	0.00448623	0	0.0393094
	1	0.063621	0.036447	0.037328	0.0341714	0.0257635	0.0264042
	1.5	0.10743	0.104669	0.06878	0.0858975	0.062517	0.079217
	2	0.187547	0.163159	0.129425	0.162548	0.100054	0.140518
	3	0.306462	0.395833	0.150489	0.208878	0.181749	0.182245
	4.5	0.457859	0.499952	0.245974	0.303064	0.229728	0.251192
	6	0.636767	0.673098	0.407071	0.425079	0.369214	0.398008
	7.5	0.887576	0.924111	0.602772	0.611162	0.553959	0.521774
Figure 4d
	Repair ratio
	High transcription
		WT			hpr1
	Experiment	1	2	3	1	2	3
Gal(h)	0	0	0	0	0	0	0
	0.5	0.0119397	0.002438	0	0	0.0445822	0			Fig. 4d WT lines 1-8					Fig. 4d hpr1∆ lines 1-8
	1	0.0378378	0.113445	0.0178957	0.0147408	0.017245	0.0033959
	1.5	0.120051	0.0383616	0.0779599	0.0694833	0.0568672	0.0535898
	2	0.24645	0.132774	0.147282	0.137908	0.121385	0.10039
	3	0.37349	0.290645	0.233967	0.203293	0.164118	0.212554
	4.5	0.476241	0.433603	0.375083	0.259918	0.236902	0.297986
	6	0.627401	0.575832	0.613385	0.412897	0.346964	0.466589
