# Supplementary material for: DNA-RNA hybrids at DSBs interfere with repair by homologous recombination
Source: eLife. 2021 Jul 8;10:e69881. doi: 10.7554/eLife.69881 (PMC8289408; doi:10.7554/eLife.69881)
Supplement: Figure 5—figure supplement 1—source data 1. [file elife-69881-fig5-figsupp1-data1.xlsx]

## Sheet: 5-s1
Figure 5-figure supplement 1a
Low transcription			Low transcription			Low transcription			Low transcription			Low transcription
	Strain	WT	Experiment	1		Strain	WT	Experiment	2		Strain	WT	Experiment	3
	Rec.	Totales	F.R.	Exp.		Rec.	Totales	F.R.	Exp.		Rec.	Totales	F.R.	Exp.
F.D.:	400	400000	1000	x10	F.D.:	40	40000	1000	x10	F.D.:	40	40000	1000	x10
1	60	52	1.15385	-3	1	240	416	0.576923	-3	1	300	500	0.6	-3
2	74	48	1.54167	-3	2	346	386	0.896373	-3	2	270	464	0.581897	-3
3	31	47	0.659574	-3	3	160	300	0.533333	-3	3	410	306	1.33987	-3
4	36	40	0.9	-3	4				-3	4	276	240	1.15	-3
5	54	69	0.782609	-3	5	238	304	0.782895	-3	5	244	400	0.61	-3
6				-3	6	216	288	0.75	-3	6	160	134	1.19403	-3
Y/X	54	51.2	1.05469	-3	Y/X	238	338.8	0.702479	-3	Y/X	273	340.667	0.80137	-3
Freq. Rec.		9	x 10	-4	Freq. Rec.		7.5	x 10	-4	Freq. Rec.		8.8	x 10	-4
	Strain	rnh1rnh201	Experiment	1		Strain	rnh1rnh201	Experiment	2		Strain	rnh1rnh201	Experiment	3
	Rec.	Totales	F.R.	Exp.		Rec.	Totales	F.R.	Exp.		Rec.	Totales	F.R.	Exp.
F.D.:	400	400000	1000	x10	F.D.:	40	40000	1000	x10	F.D.:	40	40000	1000	x10
1	135	71	1.90141	-3	1	227	94	2.41489	-3	1	500	303	1.65017	-3
2	93	86	1.0814	-3	2	256	230	1.11304	-3	2	306	137	2.23358	-3
3	124	91	1.36264	-3	3				-3	3	187	196	0.954082	-3
4	141	92	1.53261	-3	4	248	199	1.24623	-3	4				-3
5	88	64	1.375	-3	5	344	184	1.86957	-3	5	436	410	1.06341	-3
6				-3	6				-3	6				-3
Y/X	124	80.8	1.53465	-3	Y/X	252	176.75	1.42574	-3	Y/X	371	261.5	1.41874	-3
Freq. Rec.		1.375	x 10	-3	Freq. Rec.		1.5579	x 10	-3	Freq. Rec.		1.35679	x 10	-3
	Strain	hpr1	Experiment	1		Strain	hpr1	Experiment	2
	Rec.	Totales	F.R.	Exp.		Rec.	Totales	F.R.	Exp.
F.D.:	400	40000	1000	x10	F.D.:	400	40000	1000	x10
1	31	95	3.26316	-3	1	17	68	2.5	-3
2	7	64	1.09375	-3	2	49	82	5.97561	-3
3	35	106	3.30189	-3	3	64	92	6.95652	-3
4	17	38	4.47368	-3	4	17	82	2.07317	-3
5	78	62	12.5806	-3	5				-3
6	19	109	1.74312	-3	6	25	82	3.04878	-3
Y/X	25	79	3.16456	-3	Y/X	25	81.2	3.07882	-3
Freq. Rec.		3.28252	x 10	-3	Freq. Rec.		3.04878	x 10	-3
High transcription			High transcription			High transcription			High transcription			High transcription			High transcription			High transcription
	Strain	WT	Experiment	1		Strain	WT	Experiment	2		Strain	WT	Experiment	3
	Rec.	Totales	F.R.	Exp.		Rec.	Totales	F.R.	Exp.		Rec.	Totales	F.R.	Exp.
F.D.:	40	400000	1000	x10	F.D.:	400	400000	1000	x10	F.D.:	40	400000	1000	x10
1	370	287	0.12892	-3	1				-3	1	87	29	0.3	-3
2				-3	2	68	38	1.78947	-3	2	137	17	0.805882	-3
3	327	50	0.654	-3	3	11	24	0.458333	-3	3				-3
4	393	60	0.655	-3	4	86	209	0.411483	-3	4				-3
5	272	69	0.394203	-3	5	147	438	0.335616	-3	5				-3
6	339	385	0.0880519	-3	6	79	408	0.193627	-3	6	146	22	0.663636	-3
Y/X	339	170.2	0.199177	-3	Y/X	79	223.4	0.353626	-3	Y/X	137	22.6667	0.604412	-3
Freq. Rec.		3.94203	x 10	-4	Freq. Rec.		4.11483	x 10	-4	Freq. Rec.		6.63636	x 10	-4
	Strain	rnh1rnh201	Experiment	1		Strain	rnh1rnh201	Experiment	2		Strain	rnh1rnh201	Experiment	3		Strain	rnh1rnh201	Experiment	4
	Rec.	Totales	F.R.	Exp.		Rec.	Totales	F.R.	Exp.		Rec.	Totales	F.R.	Exp.		Rec.	Totales	F.R.	Exp.
F.D.:	40	400000	1000	x10	F.D.:	400	400000	1000	x10	F.D.:	40	40000	1000	x10	F.D.:	40	40000	1000	x10
1	452	73	0.619178	-3	1	76	20	3.8	-3	1	306	53	5.77358	-3	1	250	76	3.28947	-3
2	402	33	1.21818	-3	2	182	41	4.43902	-3	2	89	88	1.01136	-3	2	77	44	1.75	-3
3	512	33	1.55152	-3	3	148	60	2.46667	-3	3	171	148	1.15541	-3	3	320	82	3.90244	-3
4				-3	4	184	42	4.38095	-3	4	122	69	1.76812	-3	4	232	107	2.16822	-3
5	494	35	1.41143	-3	5	88	24	3.66667	-3	5				-3	5	236	87	2.71264	-3
6	436	10	4.36	-3	6	295	76	3.88158	-3	6				-3	6	324	160	2.025	-3
Y/X	452	36.8	1.22826	-3	Y/X	165	43.8333	3.76426	-3	Y/X	146.5	89.5	1.63687	-3	Y/X	243	92.6667	2.6223	-3
Freq. Rec.		1.41143	x 10	-3	Freq. Rec.		3.84079	x 10	-3	Freq. Rec.		1.46176	x 10	-3	Freq. Rec.		2.44043	x 10	-3
	Strain	hpr1	Experiment	1		Strain	hpr1	Experiment	2
	Rec.	Totales	F.R.	Exp.		Rec.	Totales	F.R.	Exp.
F.D.:	400	40000	1000	x10	F.D.:	400	40000	1000	x10
1	9	13	6.92308	-3	1	26	86	3.02326	-3
2	195	35	55.7143	-3	2	7	6	11.6667	-3
3	43	82	5.2439	-3	3	38	123	3.08943	-3
4	16	76	2.10526	-3	4	26	85	3.05882	-3
5	10	46	2.17391	-3	5	19	124	1.53226	-3
6	25	66	3.78788	-3	6	11	41	2.68293	-3
Y/X	20.5	53	3.86792	-3	Y/X	22.5	77.5	2.90323	-3
Freq. Rec.		4.51589	x 10	-3	Freq. Rec.		3.04104	x 10	-3
Figure 5-figure supplement 1b
		%S9.6 Inmunoprecipitation
	Experiment	WT	WT +RH	rnh1 rnh201	rnh1 rnh201 +RH	WT +FLPm	WT +FLPm +RH	rnh1rnh201 +FLPm	rnh1rnh201 +FLPm +RH
	1	0.0466531	0.0883094	0.0226583	0.0106111	2.04368	0.629595	2.31799	0.932192
	2	0.0140348	0.00751305	0.0424577	0.0247121	1.38045	0.884907	2.58988	0.597455
	3	0.0151871	0.0462361	0.049057	0.0231823	3.68862	1.83409	5.47825	1.99393
	4	0.113395	0.0125124	0.0271292	0.0212446	4.24099	2.22737	3.80549	1.5221
	5	0.054195	0.034431	0.041571	0.055188	4.59495	3.49573	7.72323	5.26798
