# Supplementary material for: DNA-RNA hybrids at DSBs interfere with repair by homologous recombination
Source: eLife. 2021 Jul 8;10:e69881. doi: 10.7554/eLife.69881 (PMC8289408; doi:10.7554/eLife.69881)
Supplement: Figure 5—source data 1. [file elife-69881-fig5-data1.xlsx]

## Sheet: Fig. 5
Figure 5b
Low transcription			Low transcription			Low transcription			Low transcription			Low transcription			Low transcription			Low transcription
	Strain	WT		1		Strain	WT	Experiment	2		Strain	WT	Experiment	3		Strain	WT	Experiment	4
	Rec.	Totales	F.R.	Exp.		Rec.	Totales	F.R.	Exp.		Rec.	Totales	F.R.	Exp.		Rec.	Totales	F.R.	Exp.
F.D.:	40000	400000	1000	x10	F.D.:	4000	40000	1000	x10	F.D.:	4000	40000	1000	x10	F.D.:	4000	40000	1000	x10
1	163	48	339.583	-3	1	290	70	414.286	-3	1	127	39	325.641	-3	1	180	53	339.623	-3
2	168	28	600	-3	2				-3	2	265	92	288.043	-3	2	150	55	272.727	-3
3	128	30	426.667	-3	3	201	35	574.286	-3	3	120	58	206.897	-3	3	134	78	171.795	-3
4	133	18	738.889	-3	4	201	48	418.75	-3	4	144	45	320	-3	4	228	77	296.104	-3
5				-3	5	210	60	350	-3	5	156	54	288.889	-3	5	179	47	380.851	-3
6	287	83	345.783	-3	6	350	127	275.591	-3	6	89	25	356	-3	6	146	44	331.818	-3
Y/X	163	41.4	393.72	-3	Y/X	210	68	308.824	-3	Y/X	135.5	52.1667	259.744	-3	Y/X	164.5	59	278.814	-3
Freq. Rec.		4.26667	x 10	-1	Freq. Rec.		4.14286	x 10	-1	Freq. Rec.		3.04444	x 10	-1	Freq. Rec.		3.13961	x 10	-1
	Strain	rnh1 rnh201	Experiment	1		Strain	rnh1 rnh201	Experiment	2	Strain	Strain	rnh1 rnh201	Experiment	3		Strain	rnh1 rnh201	Experiment	4
				+HO
	Rec.	Totales	F.R.	Exp.		Rec.	Totales	F.R.	Exp.		Rec.	Totales	F.R.	Exp.		Rec.	Totales	F.R.	Exp.
F.D.:	40000	400000	1000	x10	F.D.:	40000	400000	1000	x10	F.D.:	4000	40000	1000	x10	F.D.:	4000	40000	1000	x10
1	157	40	392.5	-3	1	104	18	577.778	-3	1	104	41	253.659	-3	1	89	21	423.81	-3
2	303	80	378.75	-3	2	213	69	308.696	-3	2	124	29	427.586	-3	2	135	41	329.268	-3
3	341	65	524.615	-3	3	183	32	571.875	-3	3	61	14	435.714	-3	3	68	27	251.852	-3
4	119	20	595	-3	4	131	22	595.455	-3	4	92	38	242.105	-3	4	67	18	372.222	-3
5	78	8	975	-3	5	122	22	554.545	-3	5	50	35	142.857	-3	5	80	26	307.692	-3
6	101	21	480.952	-3	6	122	21	580.952	-3	6	90	25	360	-3	6				-3
Y/X	138	39	353.846	-3	Y/X	126.5	30.6667	412.5	-3	Y/X	91	30.3333	300	-3	Y/X	80	26.6	300.752	-3
Freq. Rec.		5.02784	x 10	-1	Freq. Rec.		5.74826	x 10	-1	Freq. Rec.		3.06829	x 10	-1	Freq. Rec.		3.29268	x 10	-1
	Strain	hpr1	Experiment	1		Strain	hpr1	Experiment	2		Strain	hpr1	Experiment	3
	Rec.	Totales	F.R.	Exp.		Rec.	Totales	F.R.	Exp.		Rec.	Totales	F.R.	Exp.
F.D.:	4000	40000	1000	x10	F.D.:	4000	40000	1000	x10	F.D.:	4000	40000	1000	x10
1	180	48	375	-3	1	160	72	222.222	-3	1	104	27	385.185	-3
2	145	36	402.778	-3	2	82	20	410	-3	2	81	35	231.429	-3
3	130	48	270.833	-3	3	145	57	254.386	-3	3	92	22	418.182	-3
4	117	50	234	-3	4	162	36	450	-3	4	114	18	633.333	-3
5	114	46	247.826	-3	5	111	21	528.571	-3	5	220	41	536.585	-3
6	147	37	397.297	-3	6	115	42	273.81	-3	6	133	29	458.621	-3
Y/X	137.5	44.1667	311.321	-3	Y/X	130	41.3333	314.516	-3	Y/X	109	28.6667	380.233	-3
Freq. Rec.		3.22917	x 10	-1	Freq. Rec.		3.41905	x 10	-1	Freq. Rec.		4.38401	x 10	-1
High transcription			High transcription			High transcription			High transcription			High transcription			High transcription			High transcription
	Strain	WT		1		Strain	WT		2		Strain	WT		3		Strain	WT		4		Strain	WT		5
	Rec.	Totales	F.R.	Exp.		Rec.	Totales	F.R.	Exp.		Rec.	Totales	F.R.	Exp.		Rec.	Totales	F.R.	Exp.		Rec.	Totales	F.R.	Exp.
F.D.:	4000	40000	1000	x10	F.D.:	40000	400000	1000	x10	F.D.:	40000	400000	1000	x10	F.D.:	4000	40000	1000	x10	F.D.:	4000	40000	1000	x10
1	600	229	262.009	-3	1	313	124	252.419	-3	1	143	17	841.176	-3	1	238	49	485.714	-3	1	194	53	366.038	-3
2	658	185	355.676	-3	2	94	15	626.667	-3	2	117	11	1063.64	-3	2	221	55	401.818	-3	2	164	26	630.769	-3
3	696	177	393.22	-3	3	60	14	428.571	-3	3	338	45	751.111	-3	3	288	56	514.286	-3	3	181	55	329.091	-3
4	856	156	548.718	-3	4	227	64	354.688	-3	4	154	75	205.333	-3	4	173	44	393.182	-3	4	197	88	223.864	-3
5	839	162	517.901	-3	5	441	118	373.729	-3	5	64	129	49.6124	-3	5	155	49	316.327	-3	5	190	78	243.59	-3
6	892	251	355.378	-3	6	202	79	255.696	-3	6	110	33	333.333	-3	6	233	70	332.857	-3	6	82	19	431.579	-3
Y/X	767.5	193.333	396.983	-3	Y/X	214.5	69	310.87	-3	Y/X	130	51.6667	251.613	-3	Y/X	227	53.8333	421.672	-3	Y/X	185.5	53.1667	348.903	-3
Freq. Rec.		3.74448	x 10	-1	Freq. Rec.		3.64208	x 10	-1	Freq. Rec.		5.42222	x 10	-1	Freq. Rec.		3.975	x 10	-1	Freq. Rec.		3.47564	x 10	-1
	Strain	rnh1 rnh201	Experiment	1		Strain	rnh1 rnh201	Experiment	2		Strain	rnh1 rnh201	Experiment	3		Strain	rnh1 rnh201	Experiment	4		Strain	rnh1 rnh201	Experiment	5
	Rec.	Totales	F.R.	Exp.		Rec.	Totales	F.R.	Exp.		Rec.	Totales	F.R.	Exp.		Rec.	Totales	F.R.	Exp.		Rec.	Totales	F.R.	Exp.
F.D.:	4000	40000	1000	x10	F.D.:	40000	400000	1000	x10	F.D.:	40000	400000	1000	x10	F.D.:	4000	40000	1000	x10	F.D.:	4000	40000	1000	x10
1	250	90	277.778	-3	1	188	33	569.697	-3	1	138	37	372.973	-3	1	84	28	300	-3	1	51	15	340	-3
2	314	117	268.376	-3	2	336	172	195.349	-3	2				-3	2	59	17	347.059	-3	2	88	25	352	-3
3	310	64	484.375	-3	3	119	53	224.528	-3	3	182	48	379.167	-3	3	58	15	386.667	-3	3	60	18	333.333	-3
4	244	83	293.976	-3	4	130	73	178.082	-3	4	87	28	310.714	-3	4	63	21	300	-3	4	77	28	275	-3
5	188	160	117.5	-3	5	137	63	217.46	-3	5	243	153	158.824	-3	5	23	9	255.556	-3	5	49	19	257.895	-3
6	286	159	179.874	-3	6	63	203	31.0345	-3	6	222	168	132.143	-3	6	42	17	247.059	-3	6	59	28	210.714	-3
Y/X	268	112.167	238.93	-3	Y/X	133.5	99.5	134.171	-3	Y/X	182	86.8	209.677	-3	Y/X	58.5	17.8333	328.037	-3	Y/X	59.5	22.1667	268.421	-3
Freq. Rec.		2.73077	x 10	-1	Freq. Rec.		2.06405	x 10	-1	Freq. Rec.		3.10714	x 10	-1	Freq. Rec.		3	x 10	-1	Freq. Rec.		3.04167	x 10	-1
	Strain	hpr1	Experiment	1		Strain	hpr1	Experiment	2		Strain	hpr1	Experiment	3
	Rec.	Totales	F.R.	Exp.		Rec.	Totales	F.R.	Exp.		Rec.	Totales	F.R.	Exp.
F.D.:	4000	40000	1000	x10	F.D.:	4000	40000	1000	x10	F.D.:	4000	40000	1000	x10
1	62	64	96.875	-3	1	42	16	262.5	-3	1	34	9	377.778	-3
2	55	60	91.6667	-3	2	56	20	280	-3	2	40	24	166.667	-3
3	114	41	278.049	-3	3	39	49	79.5918	-3	3	98	51	192.157	-3
4	114	46	247.826	-3	4	40	41	97.561	-3	4	83	34	244.118	-3
5	124	39	317.949	-3	5	30	27	111.111	-3	5	64	51	125.49	-3
6	117	82	142.683	-3	6	50	19	263.158	-3	6	59	35	168.571	-3
Y/X	114	55.3333	206.024	-3	Y/X	41	28.6667	143.023	-3	Y/X	61.5	34	180.882	-3
Freq. Rec.		1.95255	x 10	-1	Freq. Rec.		1.86806	x 10	-1	Freq. Rec.		1.80364	x 10	-1
Figure 5c
Low transcription			Low transcription			Low transcription			Low transcription			Low transcription			Low transcription			Low transcription
	Strain	WT	Experiment	1		Strain	WT	Experiment	2		Strain	WT	Experiment	3		Strain	WT	Experiment	4		Strain	WT	Experiment	5		Strain	WT	Experiment	6		Strain	WT	Experiment	7		Strain	WT	Experiment	8		Strain	WT	Experiment	9
	Rec.	Totales	F.R.	Exp.		Rec.	Totales	F.R.	Exp.		Rec.	Totales	F.R.	Exp.		Rec.	Totales	F.R.	Exp.		Rec.	Totales	F.R.	Exp.		Rec.	Totales	F.R.	Exp.		Rec.	Totales	F.R.	Exp.		Rec.	Totales	F.R.	Exp.		Rec.	Totales	F.R.	Exp.
F.D.:	4000	40000	1000	x10	F.D.:	4000	40000	1000	x10	F.D.:	4000	40000	1000	x10	F.D.:	4000	40000	1000	x10	F.D.:	4000	40000	1000	x10	F.D.:	4000	40000	1000	x10	F.D.:	4000	40000	1000	x10	F.D.:	4000	40000	1000	x10	F.D.:	4000	40000	1000	x10
1	191	30	636.667	-3	1	43	13	330.769	-3	1	203	54	375.926	-3	1	316	97	325.773	-3	1	285	90	316.667	-3	1	193	32	603.125	-3	1	182	23	791.304	-3	1	154	26	592.308	-3	1	83	20	415	-3
2	228	37	616.216	-3	2	30	27	111.111	-3	2	445	173	257.225	-3	2	340	50	680	-3	2	223	67	332.836	-3	2	118	25	472	-3	2	201	34	591.176	-3	2	71	17	417.647	-3	2	71	12	591.667	-3
3	96	67	143.284	-3	3	71	22	322.727	-3	3	284	42	676.19	-3	3	228	70	325.714	-3	3	274	101	271.287	-3	3				-3	3	281	74	379.73	-3	3	189	23	821.739	-3	3	122	12	1016.67	-3
4	155	75	206.667	-3	4	72	15	480	-3	4	496	94	527.66	-3	4	200	28	714.286	-3	4	199	56	355.357	-3	4	225	38	592.105	-3	4	245	83	295.181	-3	4	240	42	571.429	-3	4	177	37	478.378	-3
5	184	41	448.78	-3	5	68	16	425	-3	5	400	86	465.116	-3	5	242	107	226.168	-3	5	248	56	442.857	-3	5	179	21	852.381	-3	5	175	24	729.167	-3	5	229	52	440.385	-3	5	96	13	738.462	-3
6	208	69	301.449	-3	6	66	14	471.429	-3	6	444	132	336.364	-3	6	172	47	365.957	-3	6	225	38	592.105	-3	6	161	33	487.879	-3	6	351	73	480.822	-3	6	211	41	514.634	-3	6	93	25	372	-3
Y/X	187.5	53.1667	352.665	-3	Y/X	67	17.8333	375.701	-3	Y/X	422	96.8333	435.8	-3	Y/X	235	66.5	353.383	-3	Y/X	236.5	68	347.794	-3	Y/X	179	29.8	600.671	-3	Y/X	223	51.8333	430.225	-3	Y/X	200	33.5	597.015	-3	Y/X	94.5	19.8333	476.471	-3
Freq. Rec.		3.75115	x 10	-1	Freq. Rec.		3.77885	x 10	-1	Freq. Rec.		4.20521	x 10	-1	Freq. Rec.		3.45865	x 10	-1	Freq. Rec.		3.44096	x 10	-1	Freq. Rec.		5.92105	x 10	-1	Freq. Rec.		5.35999	x 10	-1	Freq. Rec.		5.43031	x 10	-1	Freq. Rec.		5.35023	x 10	-1
	Strain	WT	Experiment	1		Strain	WT	Experiment	2		Strain	WT	Experiment	3		Strain	WT	Experiment	4		Strain	WT	Experiment	5		Strain	WT	Experiment	6		Strain	WT	Experiment	7		Strain	WT	Experiment	8		Strain	WT	Experiment	9
		RNH1					RNH1					RNH1					RNH1					RNH1					RNH1					RNH1					RNH1					RNH1
	Rec.	Totales	F.R.	Exp.		Rec.	Totales	F.R.	Exp.		Rec.	Totales	F.R.	Exp.		Rec.	Totales	F.R.	Exp.		Rec.	Totales	F.R.	Exp.		Rec.	Totales	F.R.	Exp.		Rec.	Totales	F.R.	Exp.		Rec.	Totales	F.R.	Exp.		Rec.	Totales	F.R.	Exp.
F.D.:	4000	40000	1000	x10	F.D.:	4000	40000	1000	x10	F.D.:	4000	40000	1000	x10	F.D.:	4000	40000	1000	x10	F.D.:	4000	40000	1000	x10	F.D.:	4000	40000	1000	x10	F.D.:	4000	40000	1000	x10	F.D.:	4000	40000	1000	x10	F.D.:	4000	40000	1000	x10
1	154	44	350	-3	1	195	31	629.032	-3	1	65	22	29.5455	-3	1	270	73	36.9863	-3	1	243	68	357.353	-3	1	76	16	475	-3	1	102	16	637.5	-3	1	49	13	376.923	-3	1	81	15	540	-3
2	102	28	364.286	-3	2	157	24	654.167	-3	2	123	24	51.25	-3	2	262	81	32.3457	-3	2	199	55	361.818	-3	2	172	38	452.632	-3	2	157	23	682.609	-3	2	190	69	275.362	-3	2	134	15	893.333	-3
3	99	16	618.75	-3	3	296	63	469.841	-3	3	77	15	51.3333	-3	3	230	81	28.3951	-3	3	202	53	381.132	-3	3	136	28	485.714	-3	3	163	19	857.895	-3	3	189	32	590.625	-3	3	139	26	534.615	-3
4				-3	4				-3	4	87	20	43.5	-3	4	398	82	48.5366	-3	4	243	68	357.353	-3	4	117	9	1300	-3	4	221	35	631.429	-3	4	248	28	885.714	-3	4	168	19	884.211	-3
5	236	35	674.286	-3	5	186	58	320.69	-3	5	121	60	20.1667	-3	5	204	59	34.5763	-3	5	214	60	356.667	-3	5	147	31	474.194	-3	5	167	41	407.317	-3	5	208	32	650	-3	5	120	12	1000	-3
6	177	56	316.071	-3	6	148	28	528.571	-3	6	68	51	13.3333	-3	6	270	41	65.8537	-3	6	263	74	355.405	-3	6	194	32	606.25	-3	6	191	27	707.407	-3	6	208	33	630.303	-3	6	119	33	360.606	-3
Y/X	154	35.8	430.168	-3	Y/X	186	40.8	455.882	-3	Y/X	82	32	25.625	-3	Y/X	266	69.5	38.2734	-3	Y/X	228.5	63	362.698	-3	Y/X	141.5	25.6667	551.299	-3	Y/X	165	26.8333	614.907	-3	Y/X	199	34.5	576.812	-3	Y/X	127	20	635	-3
Freq. Rec.		3.64286	x 10	-1	Freq. Rec.		5.28571	x 10	-1	Freq. Rec.		3.65227	x 10	-1	Freq. Rec.		3.57813	x 10	-1	Freq. Rec.		3.57353	x 10	-1	Freq. Rec.		4.80357	x 10	-1	Freq. Rec.		6.60054	x 10	-1	Freq. Rec.		6.10464	x 10	-1	Freq. Rec.		7.12105	x 10	-1
	Strain	hpr1	Experiment	1		Strain	hpr1	Experiment	2		Strain	hpr1	Experiment	3		Strain	hpr1	Experiment	4		Strain	hpr1	Experiment	5		Strain	hpr1	Experiment	6		Strain	hpr1	Experiment	7		Strain	hpr1	Experiment	8		Strain	hpr1	Experiment	9
	Rec.	Totales	F.R.	Exp.		Rec.	Totales	F.R.	Exp.		Rec.	Totales	F.R.	Exp.		Rec.	Totales	F.R.	Exp.		Rec.	Totales	F.R.	Exp.		Rec.	Totales	F.R.	Exp.		Rec.	Totales	F.R.	Exp.		Rec.	Totales	F.R.	Exp.		Rec.	Totales	F.R.	Exp.
F.D.:	4000	40000	1000	x10	F.D.:	4000	40000	1000	x10	F.D.:	4000	40000	1000	x10	F.D.:	4000	40000	1000	x10	F.D.:	4000	40000	1000	x10	F.D.:	4000	40000	1000	x10	F.D.:	4000	40000	1000	x10	F.D.:	4000	40000	1000	x10	F.D.:	4000	40000	1000	x10
1	77	39	197.436	-3	1	17	17	100	-3	1	86	25	344	-3	1	21	16	131.25	-3	1	148	43	344.186	-3	1	73	11	663.636	-3	1	54	27	200	-3	1	122	21	580.952	-3	1	117	20	585	-3
2	80	28	285.714	-3	2	36	35	102.857	-3	2	200	25	800	-3	2	51	9	566.667	-3	2	156	26	600	-3	2	112	20	560	-3	2	116	55	210.909	-3	2	121	21	576.19	-3	2	85	19	447.368	-3
3	52	41	126.829	-3	3	94	12	783.333	-3	3	222	51	435.294	-3	3	27	42	64.2857	-3	3	147	32	459.375	-3	3	180	45	400	-3	3	88	48	183.333	-3	3	323	41	787.805	-3	3	152	39	389.744	-3
4	61	30	203.333	-3	4	38	42	90.4762	-3	4	111	35	317.143	-3	4	63	19	331.579	-3	4	124	40	310	-3	4	132	33	400	-3	4	131	13	1007.69	-3	4	118	19	621.053	-3	4	78	11	709.091	-3
5	59	23	256.522	-3	5	83	27	307.407	-3	5	123	27	455.556	-3	5	29	17	170.588	-3	5	117	23	508.696	-3	5	155	51	303.922	-3	5	105	11	954.545	-3	5	74	11	672.727	-3	5	118	31	380.645	-3
6	99	23	430.435	-3	6	144	33	436.364	-3	6	146	29	503.448	-3	6	40	13	307.692	-3	6	157	42	373.81	-3	6	155	67	231.343	-3	6	71	30	236.667	-3	6	144	23	626.087	-3	6	106	27	392.593	-3
Y/X	69	30.6667	225	-3	Y/X	60.5	27.6667	218.675	-3	Y/X	134.5	32	420.312	-3	Y/X	34.5	19.3333	178.448	-3	Y/X	147.5	34.3333	429.612	-3	Y/X	143.5	37.8333	379.295	-3	Y/X	96.5	30.6667	314.674	-3	Y/X	121.5	22.6667	536.029	-3	Y/X	111.5	24.5	455.102	-3
Freq. Rec.		2.29928	x 10	-1	Freq. Rec.		2.05132	x 10	-1	Freq. Rec.		4.45425	x 10	-1	Freq. Rec.		2.3914	x 10	-1	Freq. Rec.		4.16592	x 10	-1	Freq. Rec.		4	x 10	-1	Freq. Rec.		2.23788	x 10	-1	Freq. Rec.		6.2357	x 10	-1	Freq. Rec.		4.19981	x 10	-1
	Strain	hpr1	Experiment	1		Strain	hpr1	Experiment	2		Strain	hpr1	Experiment	3		Strain	hpr1	Experiment	4		Strain	hpr1	Experiment	5		Strain	hpr1	Experiment	6		Strain	hpr1	Experiment	7		Strain	hpr1	Experiment	8		Strain	hpr1	Experiment	9
		RNH1					RNH1					RNH1					RNH1					RNH1					RNH1					RNH1					RNH1					RNH1
	Rec.	Totales	F.R.	Exp.		Rec.	Totales	F.R.	Exp.		Rec.	Totales	F.R.	Exp.		Rec.	Totales	F.R.	Exp.		Rec.	Totales	F.R.	Exp.		Rec.	Totales	F.R.	Exp.		Rec.	Totales	F.R.	Exp.		Rec.	Totales	F.R.	Exp.		Rec.	Totales	F.R.	Exp.
F.D.:	4000	40000	1000	x10	F.D.:	4000	40000	1000	x10	F.D.:	4000	40000	1000	x10	F.D.:	4000	40000	1000	x10	F.D.:	4000	40000	1000	x10	F.D.:	4000	40000	1000	x10	F.D.:	4000	40000	1000	x10	F.D.:	4000	40000	1000	x10	F.D.:	4000	40000	1000	x10
1	77	9	855.556	-3	1	14	36	38.8889	-3	1	87	22	395.455	-3	1	54	22	245.455	-3	1	99	34	291.176	-3	1	64	14	457.143	-3	1	54	36	150	-3	1	100	21	476.19	-3	1	97	25	388	-3
2	47	26	180.769	-3	2	46	9	511.111	-3	2	58	24	241.667	-3	2	199	37	537.838	-3	2				-3	2	70	12	583.333	-3	2	87	27	322.222	-3	2	147	20	735	-3	2	100	20	500	-3
3	105	27	388.889	-3	3	55	19	289.474	-3	3	114	18	633.333	-3	3	84	75	112	-3	3	69	31	222.581	-3	3				-3	3	70	16	437.5	-3	3				-3	3	107	21	509.524	-3
4	8	6	133.333	-3	4	40	16	250	-3	4	104	24	433.333	-3	4	81	39	207.692	-3	4	82	23	356.522	-3	4				-3	4	75	19	394.737	-3	4	101	24	420.833	-3	4	92	16	575	-3
5	123	31	396.774	-3	5	58	9	644.444	-3	5	58	26	223.077	-3	5	73	45	162.222	-3	5	86	13	661.538	-3	5				-3	5	101	23	439.13	-3	5	81	16	506.25	-3	5	101	24	420.833	-3
6	133	25	532	-3	6	35	16	218.75	-3	6	149	22	677.273	-3	6	153	36	425	-3	6	122	18	677.778	-3	6				-3	6	64	17	376.471	-3	6	148	18	822.222	-3	6	66	15	440	-3
Y/X	91	20.6667	440.323	-3	Y/X	43	17.5	245.714	-3	Y/X	95.5	22.6667	421.324	-3	Y/X	82.5	42.3333	194.882	-3	Y/X	86	23.8	361.345	-3	Y/X	67	13	515.385	-3	Y/X	72.5	23	315.217	-3	Y/X	101	19.8	510.101	-3	Y/X	98.5	20.1667	488.43	-3
Freq. Rec.		3.92832	x 10	-1	Freq. Rec.		2.69737	x 10	-1	Freq. Rec.		4.14394	x 10	-1	Freq. Rec.		2.26573	x 10	-1	Freq. Rec.		3.56522	x 10	-1	Freq. Rec.		5.20238	x 10	-1	Freq. Rec.		3.85604	x 10	-1	Freq. Rec.		5.0625	x 10	-1	Freq. Rec.		4.7	x 10	-1
High transcription			High transcription			High transcription			High transcription			High transcription			High transcription			High transcription
	Strain	WT	Experiment	1		Strain	WT	Experiment	2		Strain	WT	Experiment	3		Strain	WT	Experiment	4		Strain	WT	Experiment	5		Strain	WT	Experiment	6		Strain	WT	Experiment	7		Strain	WT	Experiment	8		Strain	WT	Experiment	9
	Rec.	Totales	F.R.	Exp.		Rec.	Totales	F.R.	Exp.		Rec.	Totales	F.R.	Exp.		Rec.	Totales	F.R.	Exp.		Rec.	Totales	F.R.	Exp.		Rec.	Totales	F.R.	Exp.		Rec.	Totales	F.R.	Exp.		Rec.	Totales	F.R.	Exp.		Rec.	Totales	F.R.	Exp.
F.D.:	4000	40000	1000	x10	F.D.:	4000	40000	1000	x10	F.D.:	4000	40000	1000	x10	F.D.:	4000	40000	1000	x10	F.D.:	4000	40000	1000	x10	F.D.:	4000	40000	1000	x10	F.D.:	4000	40000	1000	x10	F.D.:	4000	40000	1000	x10	F.D.:	4000	40000	1000	x10
1	168	33	509.091	-3	1	64	17	376.471	-3	1	430	96	447.917	-3	1	242	49	493.878	-3	1	380	70	542.857	-3	1	198	34	582.353	-3	1	89	34	261.765	-3	1	191	78	244.872	-3	1	120	30	400	-3
2	109	81	134.568	-3	2	91	12	758.333	-3	2	354	107	330.841	-3	2	467	54	864.815	-3	2	242	78	310.256	-3	2	112	22	509.091	-3	2	206	46	447.826	-3	2	194	52	373.077	-3	2	159	32	496.875	-3
3	213	35	608.571	-3	3	105	19	552.632	-3	3	361	117	308.547	-3	3	270	56	482.143	-3	3	318	82	387.805	-3	3	128	26	492.308	-3	3	242	45	537.778	-3	3	240	53	452.83	-3	3	176	22	12800	-3
4	186	63	295.238	-3	4	88	14	628.571	-3	4	378	181	208.84	-3	4	320	154	207.792	-3	4	334	99	337.374	-3	4	146	12	1216.67	-3	4	145	19	763.158	-3	4	212	56	378.571	-3	4	102	14	728.571	-3
5	203	45	451.111	-3	5	75	28	267.857	-3	5	456	133	342.857	-3	5	217	33	657.576	-3	5	334	78	428.205	-3	5	123	17	723.529	-3	5	226	53	426.415	-3	5	201	30	670	-3	5	128	15	853.333	-3
6	253	35	722.857	-3	6	46	2	2300	-3	6	432	187	231.016	-3	6	516	82	629.268	-3	6	244	136	179.412	-3	6	214	37	578.378	-3	6	250	43	581.395	-3	6	149	20	745	-3	6				-3
Y/X	194.5	48.6667	399.658	-3	Y/X	81.5	15.3333	531.522	-3	Y/X	404	136.833	295.25	-3	Y/X	295	71.3333	413.551	-3	Y/X	326	90.5	360.221	-3	Y/X	137	24.6667	555.405	-3	Y/X	216	40	540	-3	Y/X	197.5	48.1667	410.035	-3	Y/X	128	22.6	566.372	-3
Freq. Rec.		4.80101	x 10	-1	Freq. Rec.		5.90602	x 10	-1	Freq. Rec.		3.19694	x 10	-1	Freq. Rec.		5.61573	x 10	-1	Freq. Rec.		3.62589	x 10	-1	Freq. Rec.		5.80366	x 10	-1	Freq. Rec.		4.92802	x 10	-1	Freq. Rec.		4.15701	x 10	-1	Freq. Rec.		7.28571	x 10	-1
	Strain	WT	Experiment	1		Strain	WT	Experiment	2		Strain	WT	Experiment	3		Strain	WT	Experiment	4		Strain	WT	Experiment	5		Strain	WT	Experiment	6		Strain	WT	Experiment	7		Strain	WT	Experiment	8		Strain	WT	Experiment	9
		RNH1					RNH1					RNH1					RNH1										RNH1					RNH1					RNH1					RNH1
	Rec.	Totales	F.R.	Exp.		Rec.	Totales	F.R.	Exp.		Rec.	Totales	F.R.	Exp.		Rec.	Totales	F.R.	Exp.		Rec.	Totales	F.R.	Exp.		Rec.	Totales	F.R.	Exp.		Rec.	Totales	F.R.	Exp.		Rec.	Totales	F.R.	Exp.		Rec.	Totales	F.R.	Exp.
F.D.:	4000	40000	1000	x10	F.D.:	4000	40000	1000	x10	F.D.:	4000	40000	1000	x10	F.D.:	4000	40000	1000	x10	F.D.:	4000	40000	1000	x10	F.D.:	4000	40000	1000	x10	F.D.:	4000	40000	1000	x10	F.D.:	4000	40000	1000	x10	F.D.:	4000	40000	1000	x10
1	155	48	322.917	-3	1	116	27	429.63	-3	1	116	62	187.097	-3	1	81	26	311.538	-3	1	297	69	430.435	-3	1	115	52	221.154	-3	1	74	11	672.727	-3	1	126	56	225	-3	1	133	17	782.353	-3
2	114	39	292.308	-3	2	234	103	227.184	-3	2	236	27	874.074	-3	2	78	18	433.333	-3	2	230	136	169.118	-3	2	90	10	900	-3	2	183	50	366	-3	2	153	30	510	-3	2	68	11	618.182	-3
3	153	45	340	-3	3	127	28	453.571	-3	3	115	73	157.534	-3	3	75	25	300	-3	3	152	128	118.75	-3	3	125	17	735.294	-3	3	140	14	1000	-3	3	124	25	496	-3	3	92	12	766.667	-3
4	252	57	442.105	-3	4	192	90	213.333	-3	4	243	42	578.571	-3	4	80	27	296.296	-3	4	234	46	508.696	-3	4	178	27	659.259	-3	4	143	31	461.29	-3	4	114	19	600	-3	4	59	16	368.75	-3
5	77	89	86.5169	-3	5	217	56	387.5	-3	5	167	34	491.176	-3	5				-3	5	186	104	178.846	-3	5	130	16	812.5	-3	5	180	30	600	-3	5	84	11	763.636	-3	5	70	18	388.889	-3
6	171	46	371.739	-3	6	146	43	339.535	-3	6	83	70	118.571	-3	6	121	33	366.667	-3	6	299	60	498.333	-3	6	200	39	512.821	-3	6	162	45	360	-3	6	201	37	543.243	-3	6	186	59	315.254	-3
Y/X	154	54	285.185	-3	Y/X	169	57.8333	292.219	-3	Y/X	141.5	51.3333	275.649	-3	Y/X	80	25.8	310.078	-3	Y/X	232	90.5	256.354	-3	Y/X	127.5	26.8333	475.155	-3	Y/X	152.5	30.1667	505.525	-3	Y/X	125	29.6667	421.348	-3	Y/X	81	22.1667	365.414	-3
Freq. Rec.		3.31458	x 10	-1	Freq. Rec.		3.63517	x 10	-1	Freq. Rec.		3.39137	x 10	-1	Freq. Rec.		3.11538	x 10	-1	Freq. Rec.		3.0464	x 10	-1	Freq. Rec.		6.97277	x 10	-1	Freq. Rec.		5.30645	x 10	-1	Freq. Rec.		5.26622	x 10	-1	Freq. Rec.		5.03535	x 10	-1
	Strain	hpr1	Experiment	1		Strain	hpr1	Experiment	2		Strain	hpr1	Experiment	3		Strain	hpr1	Experiment	4		Strain	hpr1	Experiment	5		Strain	hpr1	Experiment	6		Strain	hpr1	Experiment	7		Strain	hpr1	Experiment	8		Strain	hpr1	Experiment	9
	Rec.	Totales	F.R.	Exp.		Rec.	Totales	F.R.	Exp.		Rec.	Totales	F.R.	Exp.		Rec.	Totales	F.R.	Exp.		Rec.	Totales	F.R.	Exp.		Rec.	Totales	F.R.	Exp.		Rec.	Totales	F.R.	Exp.		Rec.	Totales	F.R.	Exp.		Rec.	Totales	F.R.	Exp.
F.D.:	4000	40000	1000	x10	F.D.:	4000	40000	1000	x10	F.D.:	4000	40000	1000	x10	F.D.:	4000	40000	1000	x10	F.D.:	4000	40000	1000	x10	F.D.:	4000	40000	1000	x10	F.D.:	4000	40000	1000	x10	F.D.:	4000	40000	1000	x10	F.D.:	4000	40000	1000	x10
1	28	61	45.9016	-3	1	72	24	300	-3	1	111	49	226.531	-3	1	243	81	300	-3	1	105	28	375	-3	1	54	14	385.714	-3	1	53	39	135.897	-3	1	34	8	425	-3	1	90	43	209.302	-3
2	115	60	191.667	-3	2	72	13	553.846	-3	2	96	18	533.333	-3	2	253	97	260.825	-3	2	78	43	181.395	-3	2	42	25	168	-3	2	74	36	205.556	-3	2	86	34	252.941	-3	2	92	22	418.182	-3
3	84	29	289.655	-3	3	49	27	181.481	-3	3	96	46	208.696	-3	3				-3	3	89	53	167.925	-3	3	69	15	460	-3	3	37	11	336.364	-3	3	76	16	475	-3	3	80	41	195.122	-3
4	36	25	144	-3	4	80	35	228.571	-3	4	102	63	161.905	-3	4				-3	4	87	45	193.333	-3	4	80	16	500	-3	4	110	36	305.556	-3	4	74	26	284.615	-3	4	105	51	205.882	-3
5	37	28	132.143	-3	5	62	24	258.333	-3	5	106	76	139.474	-3	5				-3	5	105	35	300	-3	5	50	13	384.615	-3	5	55	10	550	-3	5	52	19	273.684	-3	5	89	13	684.615	-3
6	69	33	209.091	-3	6	40	32	125	-3	6	51	47	108.511	-3	6				-3	6	102	34	300	-3	6	38	25	152	-3	6	69	27	255.556	-3	6	62	15	413.333	-3	6	83	22	377.273	-3
Y/X	53	39.3333	134.746	-3	Y/X	67	25.8333	259.355	-3	Y/X	99	49.8333	198.662	-3	Y/X	248	89	278.652	-3	Y/X	95.5	39.6667	240.756	-3	Y/X	52	18	288.889	-3	Y/X	62	26.5	233.962	-3	Y/X	68	19.6667	345.763	-3	Y/X	89.5	32	279.688	-3
Freq. Rec.		1.67833	x 10	-1	Freq. Rec.		2.43452	x 10	-1	Freq. Rec.		1.853	x 10	-1	Freq. Rec.		2.80412	x 10	-1	Freq. Rec.		2.46667	x 10	-1	Freq. Rec.		3.85165	x 10	-1	Freq. Rec.		2.80556	x 10	-1	Freq. Rec.		3.48974	x 10	-1	Freq. Rec.		2.93288	x 10	-1
	Strain	hpr1	Experiment	1		Strain	hpr1	Experiment	2		Strain	hpr1	Experiment	3		Strain	hpr1	Experiment	4		Strain	hpr1	Experiment	5		Strain	hpr1	Experiment	6		Strain	hpr1	Experiment	7		Strain	hpr1	Experiment	8		Strain	hpr1	Experiment	9
		RNH1					RNH1					RNH1					RNH1					RNH1					RNH1					RNH1					RNH1					RNH1
	Rec.	Totales	F.R.	Exp.		Rec.	Totales	F.R.	Exp.		Rec.	Totales	F.R.	Exp.		Rec.	Totales	F.R.	Exp.		Rec.	Totales	F.R.	Exp.		Rec.	Totales	F.R.	Exp.		Rec.	Totales	F.R.	Exp.		Rec.	Totales	F.R.	Exp.		Rec.	Totales	F.R.	Exp.
F.D.:	4000	40000	1000	x10	F.D.:	4000	40000	1000	x10	F.D.:	4000	40000	1000	x10	F.D.:	4000	40000	1000	x10	F.D.:	4000	40000	1000	x10	F.D.:	4000	40000	1000	x10	F.D.:	4000	40000	1000	x10	F.D.:	4000	40000	1000	x10	F.D.:	4000	40000	1000	x10
1	31	35	88.5714	-3	1	39	8	487.5	-3	1	107	20	535	-3	1	72	36	200	-3	1	77	23	334.783	-3	1	37	7	528.571	-3	1	55	28	196.429	-3	1				-3	1	56	10	560	-3
2	110	18	611.111	-3	2	68	34	200	-3	2	82	25	328	-3	2	53	49	108.163	-3	2	64	20	320	-3	2	24	3	800	-3	2	38	14	271.429	-3	2	45	12	375	-3	2	86	14	614.286	-3
3	141	80	176.25	-3	3	62	36	172.222	-3	3	45	46	97.8261	-3	3	49	9	544.444	-3	3	74	23	321.739	-3	3	80	10	800	-3	3	59	22	268.182	-3	3	43	10	430	-3	3	85	16	531.25	-3
4	64	20	320	-3	4	44	19	231.579	-3	4	92	63	146.032	-3	4	67	30	223.333	-3	4	83	31	267.742	-3	4	44	4	1100	-3	4	52	27	192.593	-3	4	50	10	500	-3	4	118	48	245.833	-3
5	113	20	565	-3	5	78	8	975	-3	5	106	12	883.333	-3	5	63	30	210	-3	5	86	23	373.913	-3	5	22	6	366.667	-3	5	49	7	700	-3	5	63	21	300	-3	5	79	36	219.444	-3
6	119	36	330.556	-3	6	105	31	338.71	-3	6	82	15	546.667	-3	6	85	60	141.667	-3	6	91	24	379.167	-3	6	79	13	607.692	-3	6	141	64	220.312	-3	6	103	16	643.75	-3	6	82	21	390.476	-3
Y/X	111.5	34.8333	320.096	-3	Y/X	65	22.6667	286.765	-3	Y/X	87	30.1667	288.398	-3	Y/X	65	35.6667	182.243	-3	Y/X	80	24	333.333	-3	Y/X	40.5	7.16667	565.116	-3	Y/X	53.5	27	198.148	-3	Y/X	50	13.8	362.319	-3	Y/X	83.5	24.1667	345.517	-3
Freq. Rec.		3.25278	x 10	-1	Freq. Rec.		2.85144	x 10	-1	Freq. Rec.		4.315	x 10	-1	Freq. Rec.		2.05	x 10	-1	Freq. Rec.		3.28261	x 10	-1	Freq. Rec.		7.03846	x 10	-1	Freq. Rec.		2.44247	x 10	-1	Freq. Rec.		4.3	x 10	-1	Freq. Rec.		4.60863	x 10	-1
Figure 5d
	%S9.6 Inmunoprecipitation
Experiment	WT	WT +RH	rnh1 rnh201	rnh1 rnh2 +RH	WT +FLPm	WT +FLPm +RH	rnh1rnh201 +FLPm	rnh1rnh201 +FLPm +RH
1	0.195099	0.113398	0.160276	0.0919636	0.723453	0.334018	1.1356	0.215185
2	0.190131	0.203025	0.158143	0.0760231	0.853083	0.266072	1.15406	0.304216
3	0.582983	0.269458	0.356492	0.158627	2.39381	1.31347	2.47662	1.01513
4	0.401543	0.35635	0.550553	0.243715	2.15583	0.90796	2.28337	1.10869
5	0.326921	0.233307	0.427679	0.223245	1.46855	1.21555	1.73971	1.03574
Figure 5e
	%S9.6 inmunoprecipitation
Experiment	WT	WT (+RNH1)	rnh1 rnh201	rnh1 rnh201 +RH	WT +FLPm	WT +FLPm +RH	rnh1rnh201 +FLPm	rnh1rnh201 +FLPm +RH
1	0.198555	0.104579	0.208355	0.087381	0.857199	0.38826	0.6384	0.193436
2	0.312155	0.145608	0.28261	0.131511	1.13321	0.530523	0.752658	0.487323
3	0.226483	0.127136	0.292679	0.093479	0.9658	0.349597	0.686054	0.191362
4	0.282246	0.086149	0.372574	0.108052	0.941247	0.214525	0.851197	0.241063
Figure 5f
	WT	WT +RH	rnh1 rnh201	rnh1 rnh201 +RH	WT +FLPm	WT +FLPm +RH	rnh1rnh2 +FLPm	rnh1rnh201 +FLPm +RH
Experiment	%S9.6 Inmunoprecipitation
1	1.13694	0.709227	1.02285	0.737273	1.5155	0.986685	1.16315	0.493956
2	0.646535	0.293922	0.750709	0.340858	0.968225	0.477653	1.28339	0.332093
3	4.33095	2.54067	2.60061	0.633106	3.91792	1.73336	3.49957	1.45579
4	3.25324	2.61518	3.20161	1.78605	2.21968	1.26007	2.8269	3.34241
5	1.55868	1.38841	1.72595	1.30999	2.44762	1.41514	1.91368	2.29136
