# Supplementary material for: DNA-RNA hybrids at DSBs interfere with repair by homologous recombination
Source: eLife. 2021 Jul 8;10:e69881. doi: 10.7554/eLife.69881 (PMC8289408; doi:10.7554/eLife.69881)
Supplement: Figure 6—figure supplement 1—source data 1. [file elife-69881-fig6-figsupp1-data1.xlsx]

## Sheet: 6-s1
Figure 6-figure supplement 1a
	%S9.6 Inmunoprecipitation
	WT	WT +RH	WT +FLPm	WT +FLPm +RH	WT	WT +RH	WT +FLPm	WT +FLPm +RH
Experiment	FRT-T				FRT-NT
1	0.72222	0.467585	1.66361	0.889039	0.811862	0.55477	2.60328	0.245886
2	0.663246	0.29138	0.806797	0.212841	0.568685	0.176211	1.54082	0.317622
3	0.735912	0.384355	3.89728	0.780463	0.796259	0.26123	5.23825	1.58292
Figure 6-figure supplement 1b
	%S9.6 Inmunoprecipitation
	WT	WT +RH	WT +FLPm	WT +FLPm +RH	WT	WT +RH	WT +FLPm	WT +FLPm +RH
Experiment	FRT-T				FRT-NT
1	0.814751	0.424891	0.684444	0.510792	0.907964	0.495202	0.875388	2.02053
2	0.401244	0.200504	0.39346	0.176225	0.59534	0.51835	0.625723	0.326282
3	1.09872	0.476156	2.16352	0.98358	1.52723	0.539387	2.19686	0.855118
