# Supplementary material for: DNA-RNA hybrids at DSBs interfere with repair by homologous recombination
Source: eLife. 2021 Jul 8;10:e69881. doi: 10.7554/eLife.69881 (PMC8289408; doi:10.7554/eLife.69881)
Supplement: Figure 6—source data 1. [file elife-69881-fig6-data1.xlsx]

## Sheet: Fig. 6
Figure 6b
Low transcription		Low transcription		Low transcription		Low transcription		Low transcription		Low transcription		Low transcription		Low transcription
		WT	FRTt	1			WT	FRTt	2			WT	FRTt	3
	Rec.	Totales	F.R.	Exp.		Rec.	Totales	F.R.	Exp.		Rec.	Totales	F.R.	Exp.
F.D.:	2	40000	1000	x10	F.D.:	2	40000	1000	x10	F.D.:	2	40000	1000	x10
1	166	446	0.0186099	-3	1	75	224	0.0167411	-3	1	58	108	0.0268519	-3
2	109	360	0.0151389	-3	2	94	167	0.0281437	-3	2	73	123	0.0296748	-3
3	180	420	0.0214286	-3	3	71	242	0.0146694	-3	3	83	141	0.0294326	-3
4	450	396	0.0568182	-3	4				-3	4	111	116	0.0478448	-3
5	162	272	0.0297794	-3	5	110	209	0.0263158	-3	5	52	101	0.0257426	-3
6	91	358	0.0127095	-3	6	348	247	0.0704453	-3	6	38	104	0.0182692	-3
Y/X	164	375.333	0.0218472	-3	Y/X	94	217.8	0.0215794	-3	Y/X	65.5	115.5	0.028355	-3
Freq. Rec.		2.00192	x 10	-5	Freq. Rec.		2.63158	x 10	-5	Freq. Rec.		2.81422	x 10	-5
		WT	FRTnt	1			WT	FRTnt	2			WT	FRTnt	3
	Rec.	Totales	F.R.	Exp.		Rec.	Totales	F.R.	Exp.		Rec.	Totales	F.R.	Exp.
F.D.:	2	40000	1000	x10	F.D.:	2	40000	1000	x10	F.D.:	2	40000	1000	x10
1				-3	1	187	222	0.0421171	-3	1	119	147	0.0404762	-3
2	419	205	0.102195	-3	2	105	195	0.0269231	-3	2				-3
3	193	249	0.038755	-3	3	106	130	0.0407692	-3	3	163	165	0.0493939	-3
4	200	252	0.0396825	-3	4	138	209	0.0330144	-3	4	162	232	0.0349138	-3
5	334	248	0.0673387	-3	5	82	149	0.0275168	-3	5	155	132	0.0587121	-3
6	296	205	0.0721951	-3	6	228	249	0.0457831	-3	6	24	83	0.0144578	-3
Y/X	296	231.8	0.0638481	-3	Y/X	122	192.333	0.0317158	-3	Y/X	155	151.8	0.051054	-3
Freq. Rec.		6.73387	x 10	-5	Freq. Rec.		3.68918	x 10	-5	Freq. Rec.		4.04762	x 10	-5
High transcription		High transcription		High transcription		High transcription		High transcription		High transcription		High transcription		High transcription
		WT	FRTt	1			WT	FRTt	2			WT	FRTt	3
	Rec.	Totales	F.R.	Exp.		Rec.	Totales	F.R.	Exp.		Rec.	Totales	F.R.	Exp.
F.D.:	2	40000	1000	x10	F.D.:	2	40000	1000	x10	F.D.:	2	40000	1000	x10
1	110	430	0.0127907	-3	1	35	175	0.01	-3	1	48	126	0.0190476	-3
2	39	141	0.0138298	-3	2	71	218	0.0162844	-3	2	54	122	0.0221311	-3
3	121	442	0.0136878	-3	3	66	185	0.0178378	-3	3	61	98	0.0311224	-3
4	362	464	0.0390086	-3	4	51	198	0.0128788	-3	4	57	109	0.0261468	-3
5	90	330	0.0136364	-3	5	91	175	0.026	-3	5	45	122	0.0184426	-3
6	58	276	0.0105072	-3	6	318	200	0.0795	-3	6	26	69	0.0188406	-3
Y/X	100	347.167	0.0144023	-3	Y/X	68.5	191.833	0.017854	-3	Y/X	51	107.667	0.0236842	-3
Freq. Rec.		1.36621	x 10	-5	Freq. Rec.		1.70611	x 10	-5	Freq. Rec.		2.05894	x 10	-5
		WT	FRTnt	1			WT	FRTnt	2	ESTIRPE:		WT	FRTnt	3
	Rec.	Totales	F.R.	Exp.		Rec.	Totales	F.R.	Exp.		Rec.	Totales	F.R.	Exp.
F.D.:	2	40000	1000	x10	F.D.:	2	40000	1000	x10	F.D.:	2	40000	1000	x10
1	158	384	0.0205729	-3	1	146	165	0.0442424	-3	1	190	260	0.0365385	-3
2	312	161	0.0968944	-3	2	94	160	0.029375	-3	2	276	221	0.0624434	-3
3	153	180	0.0425	-3	3	55	79	0.0348101	-3	3	193	178	0.0542135	-3
4	231	276	0.0418478	-3	4	87	197	0.0220812	-3	4	256	240	0.0533333	-3
5	299	251	0.0595618	-3	5	74	144	0.0256944	-3	5	195	184	0.0529891	-3
6	192	167	0.057485	-3	6	164	139	0.0589928	-3	6	133	216	0.030787	-3
Y/X	211.5	236.5	0.0447146	-3	Y/X	90.5	147.333	0.0307127	-3	Y/X	194	216.5	0.0448037	-3
Freq. Rec.		4.99925	x 10	-5	Freq. Rec.		3.20926	x 10	-5	Freq. Rec.		5.31612	x 10	-5
Figure 6c
Low transcription		Low transcription		Low transcription		Low transcription		Low transcription		Low transcription		Low transcription		Low transcription
		WT	FRTt	1			WT	FRTt	2			WT	FRTt	3			WT	FRTt	4			WT	FRTt	5
	Rec.	Totales	F.R.	Exp.		Rec.	Totales	F.R.	Exp.		Rec.	Totales	F.R.	Exp.		Rec.	Totales	F.R.	Exp.		Rec.	Totales	F.R.	Exp.
F.D.:	4000	40000	1000	x10	F.D.:	4000	40000	1000	x10	F.D.:	4000	40000	1000	x10	F.D.:	4000	40000	1000	x10	F.D.:	4000	40000	1000	x10
1	34	37	91.8919	-3	1	55	56	98.2143	-3	1	23	37	62.1622	-3	1	18	14	128.571	-3	1	37	76	48.6842	-3
2	36	44	81.8182	-3	2	92	56	164.286	-3	2	15	39	38.4615	-3	2	21	36	58.3333	-3	2	86	84	102.381	-3
3	21	23	91.3043	-3	3	51	54	94.4444	-3	3	49	35	140	-3	3	12	41	29.2683	-3	3	86	62	138.71	-3
4	20	14	142.857	-3	4	34	31	109.677	-3	4	24	45	53.3333	-3	4	25	53	47.1698	-3	4	112	82	136.585	-3
5	48	76	63.1579	-3	5	24	26	92.3077	-3	5	27	25	108	-3	5	23	34	67.6471	-3	5	44	51	86.2745	-3
6	20	38	52.6316	-3	6	30	44	68.1818	-3	6	29	34	85.2941	-3	6	18	44	40.9091	-3	6	39	67	58.209	-3
Y/X	27.5	38.6667	71.1207	-3	Y/X	42.5	44.5	95.5056	-3	Y/X	25.5	35.8333	71.1628	-3	Y/X	19.5	37	52.7027	-3	Y/X	65	70.3333	92.4171	-3
Freq. Rec.		8.65613	x 10	-2	Freq. Rec.		9.63294	x 10	-2	Freq. Rec.		7.37281	x 10	-2	Freq. Rec.		5.27516	x 10	-2	Freq. Rec.		9.43277	x 10	-2
		WT	FRTnt	1			WT	FRTnt	2			WT	FRTnt	3			WT	FRTnt	4			WT	FRTnt	5
	Rec.	Totales	F.R.	Exp.		Rec.	Totales	F.R.	Exp.		Rec.	Totales	F.R.	Exp.		Rec.	Totales	F.R.	Exp.		Rec.	Totales	F.R.	Exp.
F.D.:	4000	40000	1000	x10	F.D.:	4000	40000	1000	x10	F.D.:	4000	40000	1000	x10	F.D.:	4000	40000	1000	x10	F.D.:	4000	40000	1000	x10
1	64	55	116.364	-3	1	163	54	301.852	-3	1	4	89	4.49438	-3	1	15	36	41.6667	-3	1	25	59	42.3729	-3
2	61	43	141.86	-3	2	152	45	337.778	-3	2	116	72	161.111	-3	2	17	36	47.2222	-3	2	105	94	111.702	-3
3	55	49	112.245	-3	3	224	72	311.111	-3	3				-3	3	32	40	80	-3	3	150	84	178.571	-3
4	38	31	122.581	-3	4	182	71	256.338	-3	4	16	93	17.2043	-3	4	22	20	110	-3	4	155	100	155	-3
5	39	39	100	-3	5	132	68	194.118	-3	5	14	102	13.7255	-3	5	36	21	171.429	-3	5	53	48	110.417	-3
6	56	52	107.692	-3	6	104	54	192.593	-3	6	1	90	1.11111	-3	6	55	25	220	-3	6	120	75	160	-3
Y/X	55.5	44.8333	123.792	-3	Y/X	157.5	60.6667	259.615	-3	Y/X	14	89.2	15.6951	-3	Y/X	27	29.6667	91.0112	-3	Y/X	112.5	76.6667	146.739	-3
Freq. Rec.		1.14304	x 10	-1	Freq. Rec.		2.79095	x 10	-1	Freq. Rec.		1.37255	x 10	-2	Freq. Rec.		9.5	x 10	-2	Freq. Rec.		1.33351	x 10	-1
		WT	FRTt	1			WT	FRTt	2			WT	FRTt	3			WT	FRTt	4			WT	FRTt	5
			RNH1					RNH1				RNH1					RNH1					RNH1
	Rec.	Totales	F.R.	Exp.		Rec.	Totales	F.R.	Exp.		Rec.	Totales	F.R.	Exp.		Rec.	Totales	F.R.	Exp.		Rec.	Totales	F.R.	Exp.
F.D.:	4000	40000	1000	x10	F.D.:	4000	40000	1000	x10	F.D.:	4000	40000	1000	x10	F.D.:	4000	40000	1000	x10	F.D.:	4000	40000	1000	x10
1	21	29	72.4138	-3	1	40	38	105.263	-3	1	31	29	106.897	-3	1	34	45	75.5556	-3	1	82	103	79.6117	-3
2	21	50	42	-3	2	54	71	76.0563	-3	2	24	37	64.8649	-3	2	14	17	82.3529	-3	2	104	120	86.6667	-3
3	19	32	59.375	-3	3	19	20	95	-3	3	30	53	56.6038	-3	3	21	46	45.6522	-3	3	64	50	128	-3
4	27	32	84.375	-3	4	32	25	128	-3	4	20	26	76.9231	-3	4	12	45	26.6667	-3	4	147	85	172.941	-3
5	35	36	97.2222	-3	5	89	74	120.27	-3	5	30	42	71.4286	-3	5	7	43	16.2791	-3	5	80	100	80	-3
6	23	28	82.1429	-3	6	24	33	72.7273	-3	6	24	48	50	-3	6	26	43	60.4651	-3	6	95	72	131.944	-3
Y/X	22	34.5	63.7681	-3	Y/X	36	43.5	82.7586	-3	Y/X	27	39.1667	68.9362	-3	Y/X	17.5	39.8333	43.9331	-3	Y/X	88.5	88.3333	100.189	-3
Freq. Rec.		7.72783	x 10	-2	Freq. Rec.		1.00132	x 10	-1	Freq. Rec.		6.81467	x 10	-2	Freq. Rec.		5.30586	x 10	-2	Freq. Rec.		1.07333	x 10	-1
		WT	FRTnt	1			WT	FRTnt	2			WT	FRTnt	3			WT	FRTnt	4			WT	FRTnt	5
			RNH1				RNH1					RNH1					RNH1					RNH1
	Rec.	Totales	F.R.	Exp.		Rec.	Totales	F.R.	Exp.		Rec.	Totales	F.R.	Exp.		Rec.	Totales	F.R.	Exp.		Rec.	Totales	F.R.	Exp.
F.D.:	4000	40000	1000	x10	F.D.:	4000	40000	1000	x10	F.D.:	4000	40000	1000	x10	F.D.:	4000	40000	1000	x10	F.D.:	4000	40000	1000	x10
1	33	35	94.2857	-3	1	82	62	132.258	-3	1	126	98	128.571	-3	1	29	29	100	-3	1	150	92	163.043	-3
2	33	37	89.1892	-3	2	168	63	266.667	-3	2	144	84	171.429	-3	2	28	26	107.692	-3	2	26	64	40.625	-3
3				-3	3	138	45	306.667	-3	3	53	84	63.0952	-3	3	23	40	57.5	-3	3	69	84	82.1429	-3
4	61	66	92.4242	-3	4	65	30	216.667	-3	4	96	64	150	-3	4	24	25	96	-3	4	50	42	119.048	-3
5	42	53	79.2453	-3	5				-3	5	87	76	114.474	-3	5	34	40	85	-3	5	126	95	132.632	-3
6	49	29	168.966	-3	6	175	58	301.724	-3	6	51	106	48.1132	-3	6	26	28	92.8571	-3	6	95	63	150.794	-3
Y/X	42	44	95.4545	-3	Y/X	138	51.6	267.442	-3	Y/X	91.5	85.3333	107.227	-3	Y/X	27	31.3333	86.1702	-3	Y/X	82	73.3333	111.818	-3
Freq. Rec.		9.24242	x 10	-2	Freq. Rec.		2.66667	x 10	-1	Freq. Rec.		1.21523	x 10	-1	Freq. Rec.		9.44286	x 10	-2	Freq. Rec.		1.2584	x 10	-1
High transcription		High transcription		High transcription		High transcription		High transcription		High transcription		High transcription		High transcription
		WT	FRTt	1			WT	FRTt	2			WT	FRTt	3			WT	FRTt	4			WT	FRTt	5
	Rec.	Totales	F.R.	Exp.		Rec.	Totales	F.R.	Exp.		Rec.	Totales	F.R.	Exp.		Rec.	Totales	F.R.	Exp.		Rec.	Totales	F.R.	Exp.
F.D.:	400	40000	1000	x10	F.D.:	4000	40000	1000	x10	F.D.:	4000	40000	1000	x10	F.D.:	400	40000	1000	x10	F.D.:	4000	40000	1000	x10
1	153	87	17.5862	-3	1	36	66	54.5455	-3	1	17	72	23.6111	-3	1	74	8.3	89.1566	-3	1	73	107	68.2243	-3
2	225	89	25.2809	-3	2	55	104	52.8846	-3	2	24	98	24.4898	-3	2	47	83	5.66265	-3	2	39	84	46.4286	-3
3	317	82	38.6585	-3	3	60	131	45.8015	-3	3	34	65	52.3077	-3	3	54	60	9	-3	3	63	92	68.4783	-3
4	222	67	33.1343	-3	4	79	135	58.5185	-3	4	30	112	26.7857	-3	4	195	129	15.1163	-3	4	30	109	27.5229	-3
5	345	59	58.4746	-3	5	68	91	74.7253	-3	5	23	91	25.2747	-3	5	57	82	6.95122	-3	5	37	80	46.25	-3
6				-3	6	50	105	47.619	-3	6	21	65	32.3077	-3	6	152	79	19.2405	-3	6	25	88	28.4091	-3
Y/X	225	76.8	29.2969	-3	Y/X	57.5	105.333	54.5886	-3	Y/X	23.5	83.8333	28.0318	-3	Y/X	65.5	73.55	8.90551	-3	Y/X	38	93.3333	40.7143	-3
Freq. Rec.		3.31343	x 10	-2	Freq. Rec.		5.3715	x 10	-2	Freq. Rec.		2.60302	x 10	-2	Freq. Rec.		1.20581	x 10	-2	Freq. Rec.		4.63393	x 10	-2
		WT	FRTnt	1			WT	FRTnt	2			WT	FRTnt	3			WT	FRTnt	4			WT	FRTnt	5
	Rec.	Totales	F.R.	Exp.		Rec.	Totales	F.R.	Exp.		Rec.	Totales	F.R.	Exp.		Rec.	Totales	F.R.	Exp.		Rec.	Totales	F.R.	Exp.
F.D.:	400	40000	1000	x10	F.D.:	4000	40000	1000	x10	F.D.:	400	40000	1000	x10	F.D.:	4000	40000	1000	x10	F.D.:	4000	40000	1000	x10
1	300	65	46.1538	-3	1	138	92	150	-3	1	13	212	0.613208	-3	1	26	79	32.9114	-3	1	44	113	38.9381	-3
2	224	36	62.2222	-3	2	156	121	128.926	-3	2	11	242	0.454545	-3	2	39	115	33.913	-3	2	36	121	29.7521	-3
3	498	63	79.0476	-3	3	186	112	166.071	-3	3	9	197	0.456853	-3	3	16	100	16	-3	3	89	119	74.7899	-3
4	266	51	52.1569	-3	4	157	92	170.652	-3	4	68	86	7.90698	-3	4	4	69	5.7971	-3	4	33	114	28.9474	-3
5	110	29	37.931	-3	5	177	133	133.083	-3	5	14	175	0.8	-3	5	18	74	24.3243	-3	5	59	75	78.6667	-3
6	140	39	35.8974	-3	6	199	121	164.463	-3	6	29	170	1.70588	-3	6	20	108	18.5185	-3	6	21	62	33.871	-3
Y/X	245	47.1667	51.9435	-3	Y/X	167	111.833	149.329	-3	Y/X	13.5	180.333	0.748614	-3	Y/X	19	90.8333	20.9174	-3	Y/X	40	100.667	39.7351	-3
Freq. Rec.		4.91554	x 10	-2	Freq. Rec.		1.57231	x 10	-1	Freq. Rec.		7.06604	x 10	-4	Freq. Rec.		2.14214	x 10	-2	Freq. Rec.		3.64045	x 10	-2
		WT	FRTt	1			WT	FRTt	2			WT	FRTt	3			WT	FRTt	4			WT	FRTt	5
			RNH1					RNH1				RNH1					RNH1					RNH1
	Rec.	Totales	F.R.	Exp.		Rec.	Totales	F.R.	Exp.		Rec.	Totales	F.R.	Exp.		Rec.	Totales	F.R.	Exp.		Rec.	Totales	F.R.	Exp.
F.D.:	400	40000	1000	x10	F.D.:	4000	40000	1000	x10	F.D.:	4000	40000	1000	x10	F.D.:	4000	40000	1000	x10	F.D.:	4000	40000	1000	x10
1	62	30	20.6667	-3	1	50	77	64.9351	-3	1	27	50	54	-3	1	21	66	31.8182	-3	1	63	66	95.4545	-3
2	445	57	78.0702	-3	2	66	124	53.2258	-3	2	55	63	87.3016	-3	2	9	55	16.3636	-3	2	76	110	69.0909	-3
3	387	56	69.1071	-3	3	39	38	102.632	-3	3	26	85	30.5882	-3	3	11	65	16.9231	-3	3	41	92	44.5652	-3
4	415	41	101.22	-3	4	101	109	92.6606	-3	4	14	33	42.4242	-3	4	33	77	42.8571	-3	4	93	79	117.722	-3
5	34	40	8.5	-3	5	60	61	98.3607	-3	5	45	54	83.3333	-3	5	8	80	10	-3	5	37	85	43.5294	-3
6	367	70	52.4286	-3	6	50	65	76.9231	-3	6	26	36	72.2222	-3	6	11	60	18.3333	-3	6	61	60	101.667	-3
Y/X	377	49	76.9388	-3	Y/X	55	79	69.6203	-3	Y/X	26.5	53.5	49.5327	-3	Y/X	11	67.1667	16.3772	-3	Y/X	62	82	75.6098	-3
Freq. Rec.		6.07679	x 10	-2	Freq. Rec.		8.47918	x 10	-2	Freq. Rec.		6.31111	x 10	-2	Freq. Rec.		1.76282	x 10	-2	Freq. Rec.		8.22727	x 10	-2
		WT	FRTnt	1			WT	FRTnt	2			WT	FRTnt	3			WT	FRTnt	4			WT	FRTnt	5
			RNH1				RNH1					RNH1					RNH1					RNH1
	Rec.	Totales	F.R.	Exp.		Rec.	Totales	F.R.	Exp.		Rec.	Totales	F.R.	Exp.		Rec.	Totales	F.R.	Exp.		Rec.	Totales	F.R.	Exp.
F.D.:	4000	40000	1000	x10	F.D.:	4000	40000	1000	x10	F.D.:	4000	40000	1000	x10	F.D.:	4000	40000	1000	x10	F.D.:	4000	40000	1000	x10
1	80	38	210.526	-3	1	206	83	248.193	-3	1	77	132	58.3333	-3	1	3	58	5.17241	-3	1	39	82	47.561	-3
2	20	32	62.5	-3	2	267	192	139.062	-3	2	98	162	60.4938	-3	2	11	50	22	-3	2	120	104	115.385	-3
3	8	18	44.4444	-3	3	213	106	200.943	-3	3	177	133	133.083	-3	3	73	68	107.353	-3	3	138	77	179.221	-3
4	86	43	200	-3	4	202	87	232.184	-3	4	84	124	67.7419	-3	4	12	53	22.6415	-3	4	25	64	39.0625	-3
5	10	33	30.303	-3	5	188	81	232.099	-3	5	133	167	79.6407	-3	5	59	50	118	-3	5	81	92	88.0435	-3
6	6	16	37.5	-3	6	181	92	196.739	-3	6	166	95	174.737	-3	6	30	30	100	-3	6	131	68	192.647	-3
Y/X	15	30	50	-3	Y/X	204	106.833	190.952	-3	Y/X	115.5	135.5	85.2399	-3	Y/X	21	51.5	40.7767	-3	Y/X	100.5	81.1667	123.819	-3
Freq. Rec.		5.34722	x 10	-2	Freq. Rec.		2.16521	x 10	-1	Freq. Rec.		7.36913	x 10	-2	Freq. Rec.		6.13208	x 10	-2	Freq. Rec.		1.01714	x 10	-1
Figure 6d
	%S9.6 inmunoprecipitation
	FRT-T				FRT-NT
Experiment	WT	WT +RH	WT +FLPm	WT +FLPm +RH	WT	WT +RH	WT +FLPm	WT +FLPm +RH
1	0.572114	0.334453	1.56559	0.782851	0.690038	0.437882	2.30745	0.695328
2	1.03802	0.702942	1.23092	0.464268	1.41763	0.528	2.27781	1.32553
3	0.360676	0.14523	0.88741	0.159858	0.489786	0.47317	0.892573	0.276134
4	1.54042	0.582343	2.43236	0.611891	1.72105	0.673016	3.64781	1.28524
Figure 6e
	%S9.6 inmunoprecipitation
	FRT-T				FRT-NT
Experiment	WT	WT +RH	WT +FLPm	WT +FLPm +RH	WT	WT +RH	WT +FLPm	WT +FLPm +RH
1	0.797476	0.363178	0.680095	0.481531	0.843855	0.407395	0.925407	0.502435
2	1.62504	0.634486	0.699035	0.47874	1.10006	0.833613	1.11145	0.400898
3	0.273379	0.188993	0.536376	0.221801	0.495568	0.495591	0.467273	0.158887
4	0.908069	0.304043	0.604592	0.310181	1.07632	0.471592	0.648577	0.22935
Figure 6f	%S9.6 inmunoprecipitation
	FRT-T				FRT-NT
Experiment	WT	WT +RH	WT +FLPm	WT +FLPm +RH	WT	WT +RH	WT +FLPm	WT +FLPm +RH
1	0.808602	0.64464	1.77989	0.213219	0.807835	0.488544	1.59308	0.973941
2	0.609894	0.288608	0.502754	0.147131	0.616562	0.19374	0.661792	0.226659
3	1.93136	0.776463	1.6688	0.47034	1.99098	0.70523	2.55798	0.942036
